# Supplementary material for: Tunable SIM properties in a family of 3D anilato-based lanthanide-MOFs
Source: Royal Society of Chemistry journal article supplement (doi:10.1039/d4qi01549e), 2024-01-01
Supplement: d4qi01549e1.pdf [file d4qi01549e1.pdf]

# Tunable SIM properties in a family of 3D anilato- based Lanthanide-MOFs

Noemi Monni,<sup>a,b</sup> Sourav Dey,<sup>a</sup> Víctor García-López,<sup>a</sup> Mariangela Oggianu,<sup>b</sup> José J. Baldoví,<sup>a</sup>

Maria Laura Mercuri,<sup>b\*</sup> Miguel Clemente-León,<sup>a\*</sup> and Eugenio Coronado<sup>a</sup>

<sup>a</sup>Instituto de Ciencia Molecular (ICMol), Universidad de Valencia, Catedrático José Beltrán 2,  
46980 Paterna, Spain

<sup>b</sup>Dipartimento di Scienze Chimiche e Geologiche, Università degli Studi di Cagliari, Complesso  
Universitario di Monserrato, 09042 Monserrato, Italy

## Table of Contents

|                                                                                                                                                                                                     |    |
|-----------------------------------------------------------------------------------------------------------------------------------------------------------------------------------------------------|----|
| 1. Elemental Analysis.....                                                                                                                                                                          | 3  |
| <b>1.1 Table S1.</b> Elemental analysis .....                                                                                                                                                       | 3  |
| 1. Crystal Structure.....                                                                                                                                                                           | 4  |
| <b>1.1 Table S2.</b> Crystallographic data for compounds <b>1-3a</b> .....                                                                                                                          | 4  |
| <b>1.2 Table S3.</b> Crystallographic data for compounds <b>1-3b</b> .....                                                                                                                          | 5  |
| <b>1.3 Table S4</b> Selected bond lengths and angles for [Dy <sub>2</sub> (trz <sub>2</sub> An) <sub>3</sub> (H <sub>2</sub> O) <sub>4</sub> ] <sub>n</sub> 10H <sub>2</sub> O ( <b>1a</b> ) .....  | 6  |
| <b>1.4 Table S5</b> Selected bond lengths and angles for [Tb <sub>2</sub> (trz <sub>2</sub> An) <sub>3</sub> (H <sub>2</sub> O) <sub>4</sub> ] <sub>n</sub> 10H <sub>2</sub> O ( <b>2a</b> ) .....  | 7  |
| <b>1.5 Table S6.</b> Selected bond lengths and angles for [Ho <sub>2</sub> (trz <sub>2</sub> An) <sub>3</sub> (H <sub>2</sub> O) <sub>4</sub> ] <sub>n</sub> 10H <sub>2</sub> O ( <b>3a</b> ) ..... | 7  |
| <b>1.6 Table S7.</b> Selected bond lengths and angles for [Dy <sub>2</sub> (trz <sub>2</sub> An) <sub>3</sub> (H <sub>2</sub> O) <sub>4</sub> ] <sub>n</sub> 7H <sub>2</sub> O ( <b>1b</b> ).....   | 8  |
| <b>1.7 Table S8.</b> Selected bond lengths and angles for [Tb <sub>2</sub> (trz <sub>2</sub> An) <sub>3</sub> (H <sub>2</sub> O) <sub>4</sub> ] <sub>n</sub> 7H <sub>2</sub> O ( <b>2b</b> ) .....  | 9  |
| <b>1.8 Table S9.</b> Selected bond lengths and angles for [Ho <sub>2</sub> (trz <sub>2</sub> An) <sub>3</sub> (H <sub>2</sub> O) <sub>4</sub> ] <sub>n</sub> 7H <sub>2</sub> O ( <b>3b</b> ) .....  | 9  |
| <b>1.9 Figure S1.</b> Experimental and calculated PXRD .....                                                                                                                                        | 10 |
| 2. FT-IR Spectroscopy .....                                                                                                                                                                         | 11 |
| <b>2.1 Figure S2.</b> FT-IR spectra of <b>H2trz2An</b> .....                                                                                                                                        | 11 |
| <b>2.2 Table S10.</b> Assignments of characteristic bands for <b>1a</b> and <b>1b</b> .....                                                                                                         | 11 |
| <b>2.3 Figure S3.</b> FT-IR spectra .....                                                                                                                                                           | 12 |
| <b>2.4 Figure S4.</b> FT-IR spectra .....                                                                                                                                                           | 12 |
| 3. Magnetic Properties and Theoretical Calculations.....                                                                                                                                            | 13 |

|      |                                                                                                                                              |    |
|------|----------------------------------------------------------------------------------------------------------------------------------------------|----|
| 3.1  | <b>Table S11.</b> The CASSCF/RASSI-SO/SINGLE_ANISO .....                                                                                     | 13 |
| 3.2  | <b>Figure S5.</b> A comparison of experimental and computed temperature dependent magnetization of <b>1a</b> .....                           | 13 |
| 3.3  | <b>Table S12.</b> The CASSCF/RASSI-SO/SINGLE_ANISO for <b>1a_des</b> .....                                                                   | 13 |
| 3.4  | <b>Figure S6.</b> The anisotropy axis of KD1 of <b>1a_des</b> .....                                                                          | 14 |
| 3.5  | <b>Table S13.</b> The CASSCF/RASSI-SO/SINGLE_ANISO computed energy and g tensors<br>14                                                       |    |
| 3.6  | <b>Figure S7.</b> The anisotropy axis of KD1 and the energy vs magnetic moment for <b>1b</b> .                                               | 15 |
| 3.7  | <b>Figure S8.</b> Loprop charge model of <b>1a</b> , <b>1a_des</b> and <b>1b</b> .....                                                       | 15 |
| 3.8  | <b>Table S14.</b> The CASSCF computed Loprop charges metal and atoms <b>1a</b> , <b>1a_des</b> and <b>1b</b> .....                           | 15 |
| 3.9  | <b>Table S15.</b> The computed crystal field parameters <b>1a</b> , <b>1a_des</b> and <b>1b</b> .....                                        | 16 |
| 3.10 | <b>Table S16.</b> The CASSCF/RASSI-SO/SINGLE_ANISO computed energy computed energy for <b>2a</b> , <b>2a-des</b> and <b>2b</b> .....         | 17 |
| 3.11 | <b>Table S17.</b> The CASSCF/RASSI-SO/SINGLE_ANISO computed $g_{zz}$ and $m_J$ composition for <b>2a</b> , <b>2a-des</b> and <b>2b</b> ..... | 17 |
| 3.12 | <b>Figure S9.</b> The anisotropy axis of KD1 and the mechanism of magnetization relaxation of <b>2a</b> .....                                | 17 |
| 3.13 | <b>Figure S10.</b> The anisotropy axis of KD1 and he mechanism of magnetization relaxation of <b>2a_des</b> .....                            | 18 |
| 3.14 | <b>Figure S11.</b> The anisotropy axis of KD1 of <b>2b</b> .....                                                                             | 19 |
| 3.15 | <b>Figure S12.</b> Loprop charge model of <b>2a</b> .....                                                                                    | 19 |
| 3.16 | <b>Table S18.</b> The CASSCF computed Loprop charges metal of <b>2a</b> , <b>2a_des</b> and <b>2b</b> .....                                  | 19 |
| 3.17 | <b>Table S19.</b> The computed crystal field parameters <b>2a</b> , <b>2a_des</b> and <b>2b</b> .....                                        | 19 |
| 3.18 | <b>Figure S13.</b> The anisotropy axis of KD1 of <b>3a</b> .....                                                                             | 21 |
| 3.19 | <b>Table S20.</b> The CASSCF/RASSI-SO/SINGLE_ANISO computed energy .....                                                                     | 21 |
| 3.20 | <b>Table S21.</b> The CASSCF/RASSI-SO/SINGLE_ANISO computed $g_{zz}$ and $m_J$ composition of first two pKDs .....                           | 22 |
| 3.21 | <b>Figure S14.</b> The anisotropy axis of KD1 of <b>3a_des</b> .....                                                                         | 22 |
| 3.22 | <b>Figure S15.</b> The anisotropy axis of KD1 of <b>3b</b> .....                                                                             | 23 |
| 3.23 | <b>Figure S16.</b> Loprop charge model of <b>3a</b> , <b>3a_des</b> and <b>3b</b> .....                                                      | 23 |
| 3.24 | <b>Table S22.</b> The CASSCF computed Loprop charges metal of <b>3a</b> , <b>3a_des</b> and <b>3b</b> .....                                  | 23 |
| 3.25 | <b>Table S23.</b> The computed crystal field parameters for <b>3a</b> , <b>3a_des</b> and <b>3b</b> .....                                    | 23 |
| 3.26 | <b>Figure S17.</b> Magnetization (M) versus field (H) of <b>1a</b> .....                                                                     | 25 |
| 3.27 | <b>Figure S18.</b> Magnetization (M) versus field (H) of <b>1a_des</b> .....                                                                 | 26 |
| 3.28 | <b>Figure S19.</b> Magnetization (M) versus field (H) of <b>1b</b> .....                                                                     | 26 |
| 3.29 | <b>Figure S20.</b> Magnetization (M) versus field (H) of <b>2a</b> .....                                                                     | 27 |
| 3.30 | <b>Figure S21.</b> Magnetization (M) versus field (H) of <b>2a_des</b> .....                                                                 | 28 |
| 3.31 | <b>Figure S22.</b> Magnetization (M) versus field (H) of <b>2b</b> .....                                                                     | 29 |
| 3.32 | <b>Figure S23.</b> Magnetization (M) versus field (H) of <b>3a</b> .....                                                                     | 29 |

|      |                                                                                             |    |
|------|---------------------------------------------------------------------------------------------|----|
| 3.33 | <b>Figure S24.</b> Magnetization (M) versus field (H) of <b>3a_des</b> .....                | 30 |
| 3.34 | <b>Figure S25.</b> Magnetization (M) versus field (H) of <b>3b</b> .....                    | 31 |
| 3.35 | <b>Figure S26.</b> Temperature dependence of $\chi'$ .....                                  | 32 |
| 3.36 | <b>Figure S27.</b> Plot of $\ln \tau$ versus $T^{-1}$ .....                                 | 33 |
| 3.37 | <b>Figure S28.</b> Thermal dependence of the relaxation time of <b>1a_des</b> .....         | 34 |
| 3.38 | <b>Figure S29.</b> Cole-Cole plots .....                                                    | 35 |
| 3.39 | <b>Figure S30.</b> AC susceptibility in an applied dc field of 0.1 T of <b>1a_des</b> ..... | 35 |
| 3.40 | <b>Figure S31.</b> AC susceptibility in an applied dc field of 0.1 T of <b>1b</b> .....     | 35 |
| 3.41 | <b>Figure S32.</b> AC susceptibility in an applied dc field of 0.1 T <b>2b</b> .....        | 36 |

## 1. Elemental Analysis

**1.1 Table S1.** Elemental analysis for all the compounds **1-3a** and **1-3b**.

|           |                                | Calculated |      |       | Found |      |       |
|-----------|--------------------------------|------------|------|-------|-------|------|-------|
|           |                                | %C         | %H   | %N    | %C    | %H   | %N    |
| <b>1a</b> | $C_{30}H_{40}N_{18}O_{26}Dy_2$ | 25.85      | 2.89 | 18.09 | 25.39 | 2.80 | 18.12 |
| <b>1b</b> | $C_{30}H_{34}N_{18}O_{23}Dy_2$ | 26.90      | 2.56 | 18.81 | 26.54 | 2.36 | 17.47 |
| <b>2a</b> | $C_{30}H_{40}N_{18}O_{26}Tb_2$ | 25.99      | 2.91 | 18.18 | 25.85 | 2.75 | 18.23 |
| <b>2b</b> | $C_{30}H_{34}N_{18}O_{23}Tb_2$ | 27.04      | 2.57 | 18.92 | 25.52 | 2.27 | 19.41 |
| <b>3a</b> | $C_{30}H_{40}N_{18}O_{26}Ho_2$ | 25.76      | 2.88 | 18.03 | 25.79 | 2.67 | 18.10 |
| <b>3b</b> | $C_{30}H_{34}N_{18}O_{23}Ho_2$ | 26.80      | 2.55 | 18.75 | 26.93 | 2.33 | 19.11 |

# 1. Crystal Structure

1.1 **Table S2.** Crystallographic data for compounds **1-3a**.

|                                          | <b>1a</b>                                                                       | <b>2a</b>                                                                       | <b>3a</b>                                                                       |
|------------------------------------------|---------------------------------------------------------------------------------|---------------------------------------------------------------------------------|---------------------------------------------------------------------------------|
| Empirical formula                        | C <sub>30</sub> H <sub>38</sub> N <sub>18</sub> O <sub>25</sub> Dy <sub>2</sub> | C <sub>30</sub> H <sub>38</sub> N <sub>18</sub> O <sub>25</sub> Tb <sub>2</sub> | C <sub>30</sub> H <sub>38</sub> N <sub>18</sub> O <sub>25</sub> Ho <sub>2</sub> |
| FW                                       | 1365.65                                                                         | 1358.50                                                                         | 1370.51                                                                         |
| Crystal color                            | Dark Red                                                                        | Dark Red                                                                        | Dark Red                                                                        |
| Crystal size (mm <sup>3</sup> )          | 0.22 × 0.16 × 0.13                                                              | 0.17 × 0.14 × 0.11                                                              | 0.2 × 0.16 × 0.08                                                               |
| Temperature (K)                          | 120                                                                             | 120                                                                             | 120                                                                             |
| Wavelength (Å)                           | (MoKa) λ = 0.71073                                                              | (MoKa) λ = 0.71073                                                              | (MoKa) λ = 0.71073                                                              |
| Crystal system                           | triclinic                                                                       | triclinic                                                                       | Triclinic                                                                       |
| Space group                              | <i>P</i> -1                                                                     | <i>P</i> -1                                                                     | <i>P</i> -1                                                                     |
| a (Å)                                    | 8.9737 (4)                                                                      | 8.9903(4)                                                                       | 8.9571 (3)                                                                      |
| b (Å)                                    | 9.4011 (4)                                                                      | 9.4164(4)                                                                       | 9.4084 (3)                                                                      |
| c (Å)                                    | 15.5290 (6)                                                                     | 15.5861(6)                                                                      | 15.4980 (4)                                                                     |
| α (°)                                    | 75.273 (4)                                                                      | 75.214(3)                                                                       | 75.173 (2)                                                                      |
| β (°)                                    | 77.475 (4)                                                                      | 77.435(4)                                                                       | 77.349 (2)                                                                      |
| γ (°)                                    | 68.042 (4)                                                                      | 68.017(4)                                                                       | 67.977 (3)                                                                      |
| V (Å <sup>3</sup> )                      | 1164.23 (9)                                                                     | 1172.01(9)                                                                      | 1159.35 (7)                                                                     |
| ρ <sub>calc</sub> (g.cm <sup>-3</sup> )  | 1.962                                                                           | 1.939                                                                           | 1.977                                                                           |
| μ(MoKα) (mm <sup>-1</sup> )              | 3.293                                                                           | 3.100                                                                           | 3.496                                                                           |
| 2θ range (°)                             | 6.516 to 56.212                                                                 | 6.514 to 55.868                                                                 | 6.626 to 54.962                                                                 |
| Index ranges                             | -11 ≤ h ≤ 11, -12 ≤ k ≤ 11, -20 ≤ l ≤ 19                                        | -11 ≤ h ≤ 11, -12 ≤ k ≤ 11, -18 ≤ l ≤ 20                                        | -10 ≤ h ≤ 11, -11 ≤ k ≤ 12, -20 ≤ l ≤ 19                                        |
| Reflections collected                    | 17487                                                                           | 15479                                                                           | 16014                                                                           |
| Independent reflections                  | 4931 [R <sub>int</sub> = 0.0259, R <sub>sigma</sub> = 0.0264]                   | 4908 [R <sub>int</sub> = 0.0406, R <sub>sigma</sub> = 0.0517]                   | 4772 [R <sub>int</sub> = 0.0238, R <sub>sigma</sub> = 0.0218]                   |
| Data/restraints/parameters               | 4931/0/359                                                                      | 4908/0/384                                                                      | 4772/0/359                                                                      |
| Goodness-of-fit on F2                    | 1.070                                                                           | 1.054                                                                           | 1.033                                                                           |
| Final R indexes [I ≥ 2σ (I)]             | R <sub>1</sub> = 0.0199<br>wR <sub>2</sub> = 0.0451                             | R <sub>1</sub> = 0.0290,<br>wR <sub>2</sub> = 0.0562                            | R <sub>1</sub> = 0.0184<br>wR <sub>2</sub> = 0.0457                             |
| Final R indexes [all data]               | R <sub>1</sub> = 0.0213<br>wR <sub>2</sub> = 0.0459                             | R <sub>1</sub> = 0.0355,<br>wR <sub>2</sub> = 0.0602                            | R <sub>1</sub> = 0.0189<br>wR <sub>2</sub> = 0.0461                             |
| Largest diff.peak/hole/e Å <sup>-3</sup> | 0.90/-0.83                                                                      | 1.01/-0.80                                                                      | 0.80/-0.80                                                                      |

1.2 Table S3. Crystallographic data for compounds 1-3b.

|                                          | <b>1b</b>                                                                       | <b>2b</b>                                                                       | <b>3b</b>                                                                       |
|------------------------------------------|---------------------------------------------------------------------------------|---------------------------------------------------------------------------------|---------------------------------------------------------------------------------|
| Empirical formula                        | C <sub>30</sub> H <sub>28</sub> N <sub>18</sub> O <sub>20</sub> Dy <sub>2</sub> | C <sub>30</sub> H <sub>28</sub> N <sub>18</sub> O <sub>20</sub> Tb <sub>2</sub> | C <sub>30</sub> H <sub>28</sub> N <sub>18</sub> O <sub>20</sub> Ho <sub>2</sub> |
| FW                                       | 1285.65                                                                         | 1278.50                                                                         | 1290.51                                                                         |
| Crystal color                            | Orange                                                                          | Orange                                                                          | Orange                                                                          |
| Crystal size (mm <sup>3</sup> )          | 0.14 × 0.09 × 0.08                                                              | 0.16 × 0.14 × 0.07                                                              | 0.29 × 0.13 × 0.09                                                              |
| Temperature (K)                          | 120                                                                             | 120                                                                             | 120                                                                             |
| Wavelength (Å)                           | (MoKa) λ = 0.71073                                                              | (MoKa) λ = 0.71073                                                              | (MoKa) λ = 0.71073                                                              |
| Crystal system                           | triclinic                                                                       | triclinic                                                                       | triclinic                                                                       |
| Space group                              | <i>P</i> -1                                                                     | <i>P</i> -1                                                                     | <i>P</i> -1                                                                     |
| a (Å)                                    | 8.6480 (4)                                                                      | 8.6577(2)                                                                       | 8.6344 (2)                                                                      |
| b (Å)                                    | 10.4211 (5)                                                                     | 10.4166(3)                                                                      | 10.4202 (2)                                                                     |
| c (Å)                                    | 12.0603 (6)                                                                     | 12.0856(4)                                                                      | 12.0281 (3)                                                                     |
| α (°)                                    | 80.197 (4)                                                                      | 80.206(2)                                                                       | 80.171 (2)                                                                      |
| β (°)                                    | 79.454 (4)                                                                      | 79.607(2)                                                                       | 79.315 (2)                                                                      |
| γ (°)                                    | 82.476 (4)                                                                      | 82.473(2)                                                                       | 82.353 (2)                                                                      |
| V (Å <sup>3</sup> )                      | 1047.33 (9)                                                                     | 1050.75(5)                                                                      | 1042.06 (4)                                                                     |
| ρ <sub>calc</sub> (g.cm <sup>-3</sup> )  | 2.038                                                                           | 2.021                                                                           | 2.057                                                                           |
| μ(MoKα) (mm <sup>-1</sup> )              | 3.644                                                                           | 3.442                                                                           | 3.874                                                                           |
| 2θ range (°)                             | 6.564 to 60.882                                                                 | 6.56 to 61.078                                                                  | 6.974 to 60.86                                                                  |
| Index ranges                             | -12 ≤ h ≤ 12, -14 ≤ k ≤ 14, -16 ≤ l ≤ 16                                        | -11 ≤ h ≤ 12, -13 ≤ k ≤ 14, -16 ≤ l ≤ 16                                        | -12 ≤ h ≤ 12, -14 ≤ k ≤ 14, -16 ≤ l ≤ 16                                        |
| Reflections collected                    | 17270                                                                           | 20971                                                                           | 20633                                                                           |
| Independent reflections                  | 5565 [R <sub>int</sub> = 0.0503, R <sub>sigma</sub> = 0.0609]                   | 5718 [R <sub>int</sub> = 0.0316, R <sub>sigma</sub> = 0.0325]                   | 5678 [R <sub>int</sub> = 0.0255, R <sub>sigma</sub> = 0.0247]                   |
| Data/restraints/parameters               | 5565/0/324                                                                      | 5718/0/324                                                                      | 5678/0/324                                                                      |
| Goodness-of-fit on F <sup>2</sup>        | 1.052                                                                           | 1.065                                                                           | 1.060                                                                           |
| Final R indexes [I ≥ 2σ (I)]             | R <sub>1</sub> = 0.0312, wR <sub>2</sub> = 0.0550                               | R <sub>1</sub> = 0.0201, wR <sub>2</sub> = 0.0441                               | R <sub>1</sub> = 0.0166, wR <sub>2</sub> = 0.0366                               |
| Final R indexes [all data]               | R <sub>1</sub> = 0.0385, wR <sub>2</sub> = 0.0592                               | R <sub>1</sub> = 0.0221, wR <sub>2</sub> = 0.0454                               | R <sub>1</sub> = 0.0175, wR <sub>2</sub> = 0.0370                               |
| Largest diff. peak/hole/eÅ <sup>-3</sup> | 0.86/-0.95                                                                      | 0.92/-0.74                                                                      | 0.74/-0.69                                                                      |

$[\text{Ln}_2(\text{trz}_2\text{An})_3(\text{H}_2\text{O})_4]_n \cdot 10\text{H}_2\text{O}$  ( $\text{Ln}^{\text{III}} = \text{Dy, Tb, Ho}$ ), Phase A

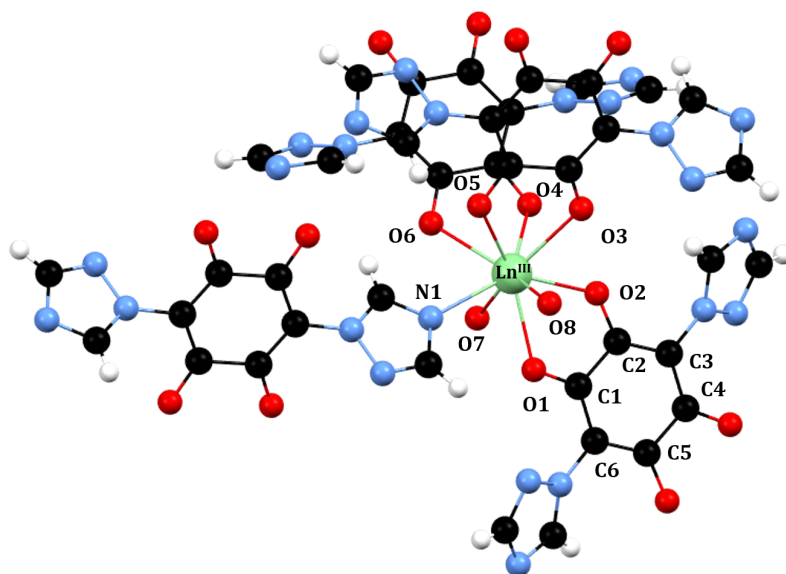

1.3 Table S4 Selected bond lengths and angles for  $[\text{Dy}_2(\text{trz}_2\text{An})_3(\text{H}_2\text{O})_4]_n \cdot 10\text{H}_2\text{O}$  (**1a**)

| Bonds   | Å          | Angles       | °         | Angles       | °         |
|---------|------------|--------------|-----------|--------------|-----------|
| Dy – O1 | 2.4253(16) | N1 – Dy – O1 | 75.82(6)  | O2 – Dy – O6 | 134.38(6) |
| Dy – O2 | 2.3449(16) | N1 – Dy – O2 | 141.57(6) | O2 – Dy – O7 | 84.32(6)  |
| Dy – O3 | 2.4303(17) | N1 – Dy – O3 | 134.56(6) | O2 – Dy – O8 | 87.99(6)  |
| Dy – O4 | 2.4007(18) | N1 – Dy – O4 | 137.20(7) | O3 – Dy – O4 | 68.95(6)  |
| Dy – O5 | 2.4511(17) | N1 – Dy – O5 | 76.46(6)  | O3 – Dy – O5 | 64.82(6)  |
| Dy – O6 | 2.4516(17) | N1 – Dy – O6 | 72.86(6)  | O3 – Dy – O6 | 108.60(6) |
| Dy – O7 | 2.3924(19) | N1 – Dy – O7 | 80.64(7)  | O3 – Dy – O7 | 144.32(6) |
| Dy – O8 | 2.3976(18) | N1 – Dy – O8 | 78.72(7)  | O3 – Dy – O8 | 69.86(6)  |
| Dy – N1 | 2.491(2)   | O1 – Dy – O2 | 65.77(6)  | O4 – Dy – O5 | 91.41(6)  |
| C1 – O1 | 1.253(3)   | O1 – Dy – O3 | 118.56(6) | O4 – Dy – O6 | 64.88(6)  |
| C2 – O2 | 1.256(3)   | O1 – Dy – O4 | 130.16(6) | O4 – Dy – O7 | 80.24(6)  |
| C1 – C2 | 1.534(3)   | O1 – Dy – O5 | 137.86(6) | O4 – Dy – O8 | 138.45(6) |
| C2 – C3 | 1.394(3)   | O1 – Dy – O6 | 132.79(6) | O5 – Dy – O6 | 65.21(6)  |
|         |            | O1 – Dy – O7 | 68.92(6)  | O5 – Dy – O7 | 135.53(6) |
|         |            | O1 – Dy – O8 | 67.97(6)  | O5 – Dy – O8 | 75.94(6)  |
|         |            | O2 – Dy – O3 | 70.20(6)  | O6 – Dy – O7 | 71.83(6)  |
|         |            | O2 – Dy – O4 | 73.27(6)  | O6 – Dy – O8 | 135.93(6) |
|         |            | O2 – Dy – O5 | 135.01(6) | O7 – Dy – O8 | 135.48(6) |

1.4 Table S5 Selected bond lengths and angles for  $[\text{Tb}_2(\text{trz}_2\text{An})_3(\text{H}_2\text{O})_4]_n \cdot 10\text{H}_2\text{O}$  (**2a**)

| Bonds   | Å        | Angles       | °         | Angles       | °         |
|---------|----------|--------------|-----------|--------------|-----------|
| Tb – O1 | 2.439(2) | N1 – Tb – O1 | 76.03(8)  | O2 – Tb – O6 | 134.42(8) |
| Tb – O2 | 2.353(2) | N1 – Tb – O2 | 141.50(8) | O2 – Tb – O7 | 84.47(9)  |
| Tb – O3 | 2.413(2) | N1 – Tb – O3 | 137.00(9) | O2 – Tb – O8 | 87.96(8)  |
| Tb – O4 | 2.438(2) | N1 – Tb – O4 | 134.35(9) | O3 – Tb – O4 | 69.02(8)  |
| Tb – O5 | 2.468(2) | N1 – Tb – O5 | 76.51(8)  | O3 – Tb – O5 | 91.21(8)  |
| Tb – O6 | 2.459(2) | N1 – Tb – O6 | 72.97(9)  | O3 – Tb – O6 | 64.53(8)  |
| Tb – O7 | 2.406(3) | N1 – Tb – O7 | 80.31(9)  | O3 – Tb – O7 | 72.08(9)  |
| Tb – O8 | 2.415(2) | N1 – Tb – O8 | 78.46(9)  | O3 – Tb – O8 | 138.75(8) |
| Tb – N1 | 2.504(3) | O1 – Tb – O2 | 65.49(7)  | O4 – Tb – O5 | 64.48(8)  |
| C1 – O1 | 1.251(4) | O1 – Tb – O3 | 130.27(8) | O4 – Tb – O6 | 108.47(8) |
| C2 – O2 | 1.253(4) | O1 – Tb – O4 | 118.54(8) | O4 – Tb – O7 | 144.88(8) |
| C1 – C2 | 1.545(4) | O1 – Tb – O5 | 137.91(8) | O4 – Tb – O8 | 70.07(8)  |
| C2 – C3 | 1.393(4) | O1 – Tb – O6 | 132.93(8) | O5 – Tb – O6 | 65.47(9)  |
| C3 – C4 | 1.392(5) | O1 – Tb – O7 | 68.45(8)  | O5 – Tb – O7 | 135.89(8) |
|         |          | O1 – Tb – O8 | 67.85(8)  | O5 – Tb – O8 | 75.85(8)  |
|         |          | O2 – Tb – O3 | 73.69(8)  | O6 – Tb – O7 | 80.86(8)  |
|         |          | O2 – Tb – O4 | 70.36(8)  | O6 – Tb – O8 | 135.98(8) |
|         |          | O2 – Tb – O5 | 134.82(8) | O7 – Tb – O8 | 134.76(8) |

1.5 Table S6. Selected bond lengths and angles for  $[\text{Ho}_2(\text{trz}_2\text{An})_3(\text{H}_2\text{O})_4]_n \cdot 10\text{H}_2\text{O}$  (**3a**)

| Bonds   | Å          | Angles       | °         | Angles       | °         |
|---------|------------|--------------|-----------|--------------|-----------|
| Ho – O1 | 2.4205(16) | N1 – Ho – O1 | 75.50(6)  | O2 – Ho – O6 | 134.38(6) |
| Ho – O2 | 2.4440(17) | N1 – Ho – O2 | 141.45(6) | O2 – Ho – O7 | 83.76(6)  |
| Ho – O3 | 2.3303(16) | N1 – Ho – O3 | 134.80(6) | O2 – Ho – O8 | 88.07(6)  |
| Ho – O4 | 2.4211(16) | N1 – Ho – O4 | 137.23(6) | O3 – Ho – O4 | 68.85(6)  |
| Ho – O5 | 2.3882(7)  | N1 – Ho – O5 | 76.48(6)  | O3 – Ho – O5 | 64.99(5)  |
| Ho – O6 | 2.4434(17) | N1 – Ho – O6 | 72.79(6)  | O3 – Ho – O6 | 108.76(6) |
| Ho – O7 | 2.3887(17) | N1 – Ho – O7 | 80.92(6)  | O3 – Ho – O7 | 143.85(6) |
| Ho – O8 | 2.3838(18) | N1 – Ho – O8 | 78.81(6)  | O3 – Ho – O8 | 69.82(6)  |
| Ho – N1 | 2.471(2)   | O1 – Ho – O2 | 65.98(5)  | O4 – Ho – O5 | 91.54(6)  |
| C1 – O1 | 1.247(3)   | O1 – Ho – O3 | 118.68(5) | O4 – Ho – O6 | 64.99(6)  |
| C2 – O2 | 1.253(3)   | O1 – Ho – O4 | 130.34(6) | O4 – Ho – O7 | 80.12(6)  |
| C1 – C2 | 1.539(3)   | O1 – Ho – O5 | 137.59(6) | O4 – Ho – O8 | 138.33(6) |
| C2 – C3 | 1.395(3)   | O1 – Ho – O6 | 132.51(6) | O5 – Ho – O6 | 65.34(6)  |
|         |            | O1 – Ho – O7 | 68.70(6)  | O5 – Ho – O7 | 136.00(6) |
|         |            | O1 – Ho – O8 | 68.07(6)  | O5 – Ho – O8 | 75.74(6)  |
|         |            | O2 – Ho – O3 | 70.15(6)  | O6 – Ho – O7 | 135.88(6) |
|         |            | O2 – Ho – O4 | 73.24(6)  | O6 – Ho – O8 | 72.12(6)  |
|         |            | O2 – Ho – O5 | 135.11(6) | O7 – Ho – O8 | 135.53(6) |

$\text{Ln}_2(\text{trz}_2\text{An})_3(\text{H}_2\text{O})_4]_n \cdot 7\text{H}_2\text{O}$  ( $\text{Ln}^{\text{III}} = \text{Dy, Tb, Ho}$ ), Phase B

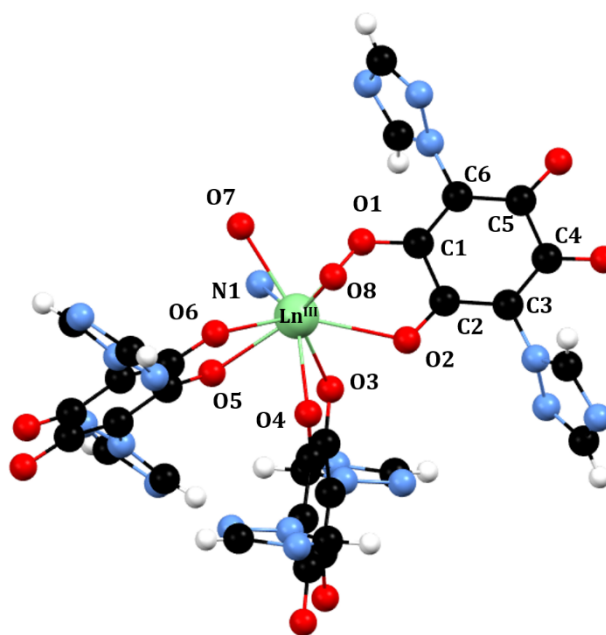

1.6 Table S7. Selected bond lengths and angles for  $[\text{Dy}_2(\text{trz}_2\text{An})_3(\text{H}_2\text{O})_4]_n \cdot 7\text{H}_2\text{O}$  (**1b**)

| Bonds   | Å        | Angles       | °         | Angles       | °         |
|---------|----------|--------------|-----------|--------------|-----------|
| Dy – O1 | 2.358(2) | N1 – Dy – O1 | 70.81(8)  | O2 – Dy – O6 | 127.08(7) |
| Dy – O2 | 2.503(2) | N1 – Dy – O2 | 116.94(8) | O2 – Dy – O7 | 131.99(8) |
| Dy – O3 | 2.417(2) | N1 – Dy – O3 | 70.98(8)  | O2 – Dy – O8 | 70.28(8)  |
| Dy – O4 | 2.378(2) | N1 – Dy – O4 | 129.79(8) | O3 – Dy – O4 | 67.26(7)  |
| Dy – O5 | 2.417(2) | N1 – Dy – O5 | 67.10(8)  | O3 – Dy – O5 | 70.84(8)  |
| Dy – O6 | 2.517(2) | N1 – Dy – O6 | 115.39(8) | O3 – Dy – O6 | 124.65(7) |
| Dy – O7 | 2.369(2) | N1 – Dy – O7 | 142.35(9) | O3 – Dy – O7 | 136.44(8) |
| Dy – O8 | 2.359(2) | N1 – Dy – O8 | 72.99(8)  | O3 – Dy – O8 | 143.96(8) |
| Dy – N1 | 2.551(3) | O1 – Dy – O2 | 65.16(7)  | O4 – Dy – O5 | 73.74(8)  |
| C1 – O1 | 1.252(4) | O1 – Dy – O3 | 92.00(8)  | O4 – Dy – O6 | 70.54(8)  |
| C2 – O2 | 1.246(4) | O1 – Dy – O4 | 135.71(8) | O4 – Dy – O7 | 87.85(8)  |
| C1 – C2 | 1.531(4) | O1 – Dy – O5 | 137.71(8) | O4 – Dy – O8 | 141.65(8) |
| C2 – C3 | 1.408(4) | O1 – Dy – O6 | 143.25(8) | O5 – Dy – O6 | 64.10(7)  |
|         |          | O1 – Dy – O7 | 81.40(8)  | O5 – Dy – O7 | 94.58(8)  |
|         |          | O1 – Dy – O8 | 76.74(8)  | O5 – Dy – O8 | 137.36(8) |
|         |          | O2 – Dy – O3 | 67.97(8)  | O6 – Dy – O7 | 71.52(8)  |
|         |          | O2 – Dy – O4 | 70.74(7)  | O6 – Dy – O8 | 73.61(8)  |
|         |          | O2 – Dy – O5 | 133.26(8) | O7 – Dy – O8 | 76.33(8)  |



1.7 **Table S8.** Selected bond lengths and angles for  $[\text{Tb}_2(\text{trz}_2\text{An})_3(\text{H}_2\text{O})_4]_n \cdot 7\text{H}_2\text{O}$  (**2b**)

| <b>Bonds</b>   | <b>Å</b>   | <b>Angles</b>       | <b>°</b>  | <b>Angles</b>       | <b>°</b>  |
|----------------|------------|---------------------|-----------|---------------------|-----------|
| <b>Tb – O1</b> | 2.4014(14) | <b>N1 – Tb – O1</b> | 67.11(5)  | <b>O2 – Tb – O6</b> | 143.30(5) |
| <b>Tb – O2</b> | 2.5260(15) | <b>N1 – Tb – O2</b> | 115.20(5) | <b>O2 – Tb – O7</b> | 71.85(5)  |
| <b>Tb – O3</b> | 2.4279(15) | <b>N1 – Tb – O3</b> | 70.98(6)  | <b>O2 – Tb – O8</b> | 74.63(5)  |
| <b>Tb – O4</b> | 2.3900(15) | <b>N1 – Tb – O4</b> | 129.57(5) | <b>O3 – Tb – O4</b> | 66.92(5)  |
| <b>Tb – O5</b> | 2.5086(15) | <b>N1 – Tb – O5</b> | 116.84(5) | <b>O3 – Tb – O5</b> | 68.19(5)  |
| <b>Tb – O6</b> | 2.3707(15) | <b>N1 – Tb – O6</b> | 70.75(5)  | <b>O3 – Tb – O6</b> | 92.42(5)  |
| <b>Tb – O7</b> | 2.3817(17) | <b>N1 – Tb – O7</b> | 72.79(6)  | <b>O3 – Tb – O7</b> | 143.77(5) |
| <b>Tb – O8</b> | 2.3672(15) | <b>N1 – Tb – O8</b> | 141.80(6) | <b>O3 – Tb – O8</b> | 136.43(5) |
| <b>Tb – N1</b> | 2.5664(18) | <b>O1 – Tb – O2</b> | 63.86(5)  | <b>O4 – Tb – O5</b> | 70.91(5)  |
| <b>C1 – O1</b> | 1.255(2)   | <b>O1 – Tb – O3</b> | 70.52(5)  | <b>O4 – Tb – O6</b> | 135.91(5) |
| <b>C2 – O2</b> | 1.246(2)   | <b>O1 – Tb – O4</b> | 73.56(5)  | <b>O4 – Tb – O7</b> | 142.03(5) |
| <b>C1 – C2</b> | 1.531(3)   | <b>O1 – Tb – O5</b> | 133.27(5) | <b>O4 – Tb – O8</b> | 88.62(5)  |
| <b>C2 – C3</b> | 1.402(3)   | <b>O1 – Tb – O6</b> | 137.67(5) | <b>O5 – Tb – O6</b> | 65.20(5)  |
|                |            | <b>O1 – Tb – O7</b> | 94.69(6)  | <b>O5 – Tb – O7</b> | 131.83(5) |
|                |            | <b>O1 – Tb – O8</b> | 138.18(5) | <b>O5 – Tb – O8</b> | 69.92(5)  |
|                |            | <b>O2 – Tb – O3</b> | 124.15(5) | <b>O6 – Tb – O7</b> | 76.34(5)  |
|                |            | <b>O2 – Tb – O4</b> | 70.58(5)  | <b>O6 – Tb – O8</b> | 80.57(5)  |
|                |            | <b>O2 – Tb – O5</b> | 127.34(5) | <b>O7 – Tb – O8</b> | 76.36(6)  |

1.8 **Table S9.** Selected bond lengths and angles for  $[\text{Ho}_2(\text{trz}_2\text{An})_3(\text{H}_2\text{O})_4]_n \cdot 7\text{H}_2\text{O}$  (**3b**)

| <b>Bonds</b>   | <b>Å</b>   | <b>Angles</b>       | <b>°</b>  | <b>Angles</b>       | <b>°</b>  |
|----------------|------------|---------------------|-----------|---------------------|-----------|
| <b>Ho – O1</b> | 2.3793(13) | <b>N1 – Ho – O1</b> | 67.20(5)  | <b>O2 – Ho – O6</b> | 142.96(4) |
| <b>Ho – O2</b> | 2.5081(13) | <b>N1 – Ho – O2</b> | 115.55(5) | <b>O2 – Ho – O7</b> | 71.39(5)  |
| <b>Ho – O3</b> | 2.4052(13) | <b>N1 – Ho – O3</b> | 70.99(5)  | <b>O2 – Ho – O8</b> | 74.02(5)  |
| <b>Ho – O4</b> | 2.3647(13) | <b>N1 – Ho – O4</b> | 130.15(5) | <b>O3 – Ho – O4</b> | 67.57(4)  |
| <b>Ho – O5</b> | 2.4956(13) | <b>N1 – Ho – O5</b> | 117.06(5) | <b>O3 – Ho – O5</b> | 68.01(4)  |
| <b>Ho – O6</b> | 2.3487(13) | <b>N1 – Ho – O6</b> | 70.49(5)  | <b>O3 – Ho – O6</b> | 91.99(4)  |
| <b>Ho – O7</b> | 2.3547(13) | <b>N1 – Ho – O7</b> | 72.84(5)  | <b>O3 – Ho – O7</b> | 143.82(5) |
| <b>Ho – O8</b> | 2.3405(13) | <b>N1 – Ho – O8</b> | 141.78(5) | <b>O3 – Ho – O8</b> | 136.32(5) |
| <b>Ho – N1</b> | 2.5396(16) | <b>O1 – Ho – O2</b> | 64.27(4)  | <b>O4 – Ho – O5</b> | 70.57(4)  |
| <b>C1 – O1</b> | 1.252(2)   | <b>O1 – Ho – O3</b> | 70.97(4)  | <b>O4 – Ho – O6</b> | 135.94(4) |
| <b>C2 – O2</b> | 1.246(2)   | <b>O1 – Ho – O4</b> | 73.96(5)  | <b>O4 – Ho – O7</b> | 141.50(5) |
| <b>C1 – C2</b> | 1.529(3)   | <b>O1 – Ho – O5</b> | 133.31(4) | <b>O4 – Ho – O8</b> | 88.05(5)  |
| <b>C2 – C3</b> | 1.404(2)   | <b>O1 – Ho – O6</b> | 137.51(5) | <b>O5 – Ho – O6</b> | 65.56(4)  |
|                |            | <b>O1 – Ho – O7</b> | 94.38(5)  | <b>O5 – Ho – O7</b> | 132.15(5) |
|                |            | <b>O1 – Ho – O8</b> | 137.98(5) | <b>O5 – Ho – O8</b> | 69.87(5)  |
|                |            | <b>O2 – Ho – O3</b> | 124.94(4) | <b>O6 – Ho – O7</b> | 76.59(5)  |
|                |            | <b>O2 – Ho – O4</b> | 70.51(4)  | <b>O6 – Ho – O8</b> | 80.86(5)  |
|                |            | <b>O2 – Ho – O5</b> | 126.83(4) | <b>O7 – Ho – O8</b> | 76.37(5)  |

**1-3a** and **1-3b** polycrystalline samples are pure and homogeneous, proving to be perfectly consistent with the calculated pattern from CIF and isostructural to the corresponding Er<sup>III</sup>-based frameworks<sup>1</sup> (**Figure S1**).

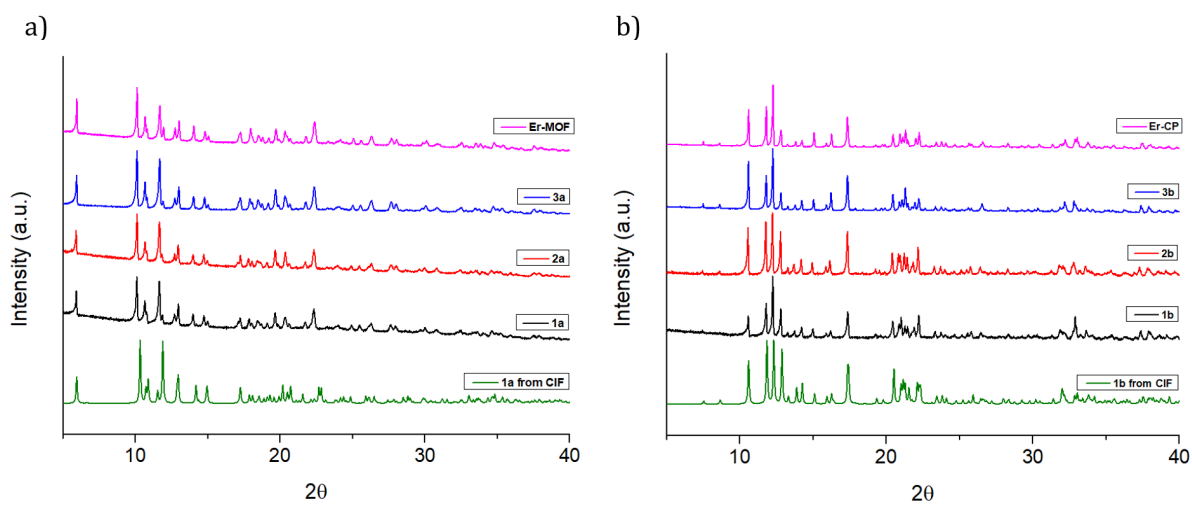

1.9 **Figure S1**. Experimental and calculated PXRD patterns in  $2\theta$  range of  $5-40^\circ$  for **1-3a** (a) and for **1-3b** (b), compared with the respective Er<sup>III</sup>-coordination networks of phase a and b (magenta lines).

## 2. FT-IR Spectroscopy

FT-IR spectra of **1-3a** and **1-3b** were performed and compared with H<sub>2</sub>trz<sub>2</sub>An linker to further confirm the coordination between trz<sub>2</sub>An and Ln<sup>III</sup> ion. **1-3a** and **1-3b** spectra are here reported, with the principal band assignment for 1a and 1b as representative of the corresponding series (**Table S10**). As shown in **Figure S2**, the band at 1650 cm<sup>-1</sup> of nC-O of free ligand disappear and the broad band centered at 1550 cm<sup>-1</sup> is downshifted, due to the coordination of C-O in the frameworks. Below 460 cm<sup>-1</sup> the typical bands related to the nLn-O stretching vibrations are present, due to the coordination bonds.

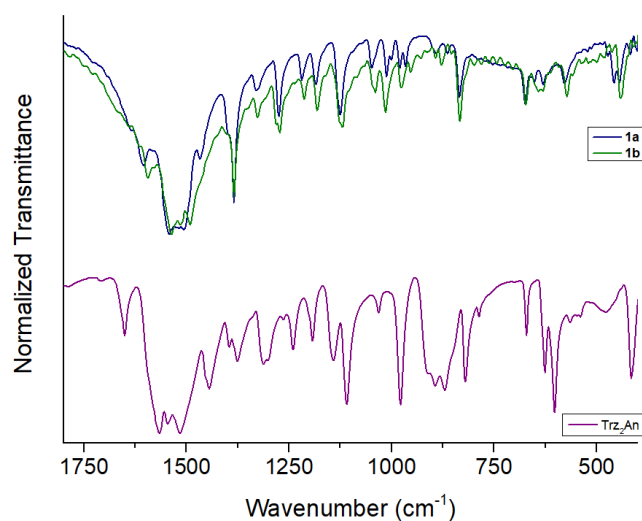

2.1 **Figure S2.** FT-IR spectra of H<sub>2</sub>trz<sub>2</sub>An (purple), **1a** (blue) and **1b** (green) in the 1800-400 cm<sup>-1</sup> region.

2.2 **Table S10.** Assignments of characteristic bands for **1a** and **1b**, all the frequencies are in cm<sup>-1</sup>

|                                | <b>1a</b> | <b>1b</b> |
|--------------------------------|-----------|-----------|
| $\nu$ O-H                      | 3388      | 3438      |
| $\nu$ C=O                      | 1605      | 1589      |
| $\nu$ C=O + $\nu$ C=C aromatic | 1513      | 1506      |
|                                | 1492      | 1488      |
| $\nu$ aromatic ring            | 1385      | 1391      |
|                                |           | 1377      |
| $\nu$ C-N                      | 1321      | 1325      |
|                                | 1272      | 1278      |
|                                |           | 1272      |
| $\nu$ N-N                      | 1183      | 1181      |
| $\delta$ C=C                   | 835       | 835       |
| $\nu$ Dy-O                     | 459       | 438       |
|                                | 446       |           |

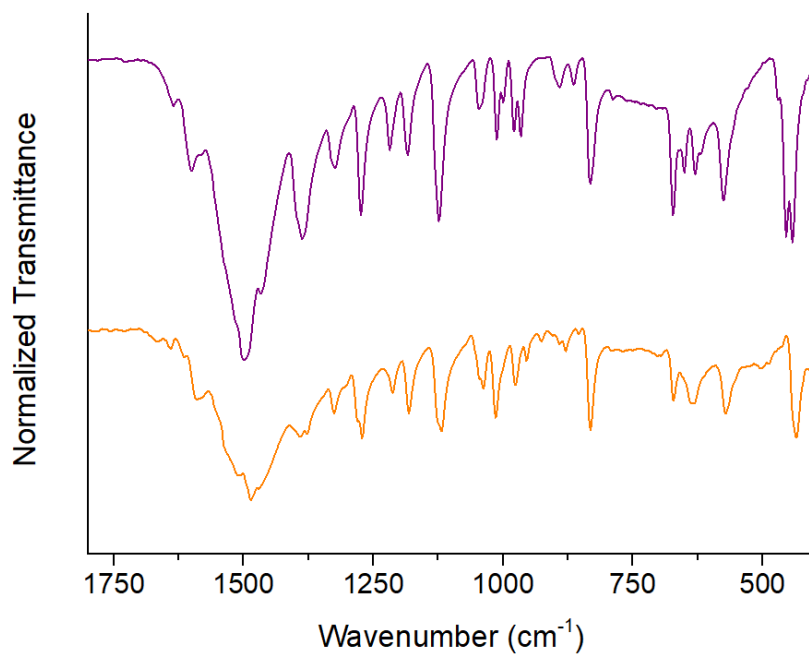

2.3 **Figure S3.** FT-IR spectra of **2a** (purple line) and **2b** (orange line) in 1800-400 cm<sup>-1</sup> range.

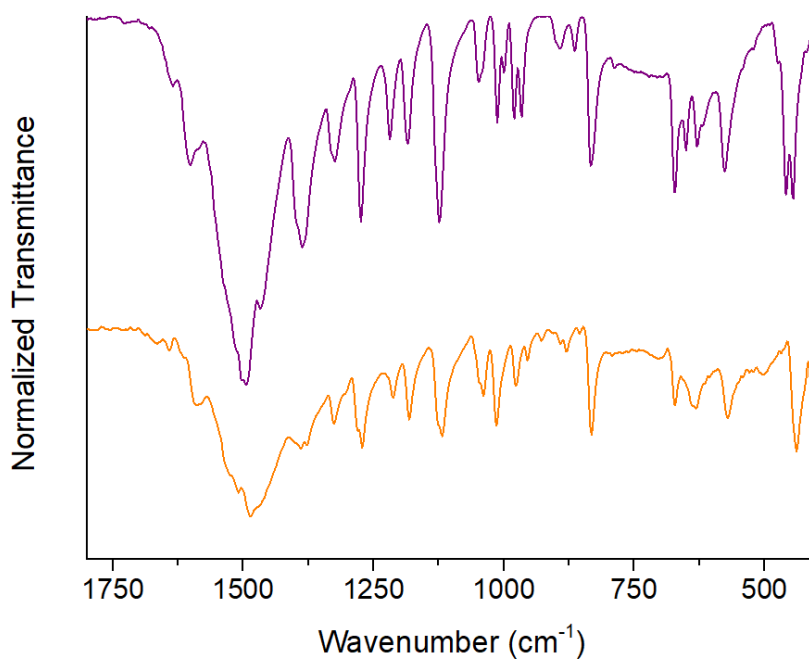

2.4 **Figure S4.** FT-IR spectra of **3a** (purple line) and **3b** (orange line) in 1800-400 cm<sup>-1</sup> range.

### 3. Magnetic Properties and Theoretical Calculations

3.1 **Table S11.** The CASSCF/RASSI-SO/SINGLE\_ANISO computed energy and g tensors of the  ${}^6\text{H}_{15/2}$  KDs for **1a**.

| Energy ( $\text{cm}^{-1}$ ) | $g_{xx}$ | $g_{yy}$ | $g_{zz}$ |
|-----------------------------|----------|----------|----------|
| 0.0                         | 0.140    | 0.244    | 18.777   |
| 71.6                        | 2.889    | 6.253    | 11.751   |
| 102.5                       | 7.901    | 5.375    | 0.398    |
| 154.9                       | 1.866    | 3.560    | 10.498   |
| 192.9                       | 0.821    | 3.614    | 14.433   |
| 222.3                       | 1.622    | 3.232    | 11.996   |
| 263.1                       | 0.773    | 1.110    | 16.893   |
| 312.7                       | 0.262    | 0.340    | 19.031   |

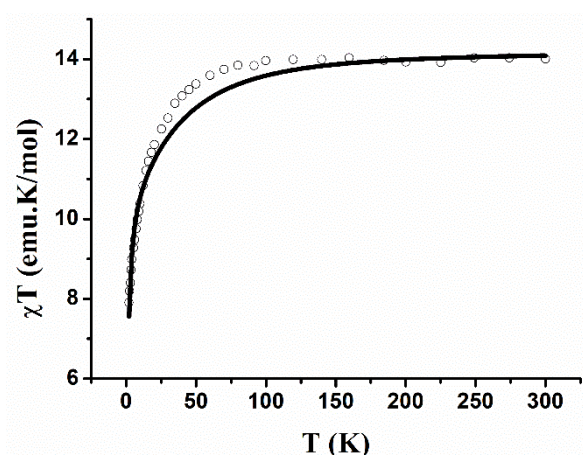

3.2 **Figure S5.** A comparison of experimental and computed temperature dependent magnetization of **1a**.

A dipolar coupling ( $zJ$ ) of  $-0.12 \text{ cm}^{-1}$  was considered in our calculations to simulate the experimental magnetic data. The experimental data has been scaled with a factor of 0.90. We have added TIP (temperature independent paramagnetism) value of  $0.003 \text{ emu/mol}$  to correct the experimental  $\chi T$  value of **1a**.

3.3 **Table S12.** The CASSCF/RASSI-SO/SINGLE\_ANISO computed energy and g tensors of the  ${}^6\text{H}_{15/2}$  KDs for **1a<sub>des</sub>**.

| Energy ( $\text{cm}^{-1}$ ) | $g_{xx}$ | $g_{yy}$ | $g_{zz}$ |
|-----------------------------|----------|----------|----------|
| 0.0                         | 0.002    | 0.006    | 19.328   |
| 139.1                       | 0.101    | 0.163    | 15.950   |
| 264.9                       | 9.641    | 6.526    | 2.764    |
| 307.1                       | 10.941   | 5.960    | 0.333    |
| 325.6                       | 0.574    | 2.462    | 12.357   |
| 385.8                       | 1.789    | 2.223    | 13.321   |
| 426.9                       | 0.316    | 0.359    | 15.546   |
| 554.4                       | 0.009    | 0.019    | 19.456   |

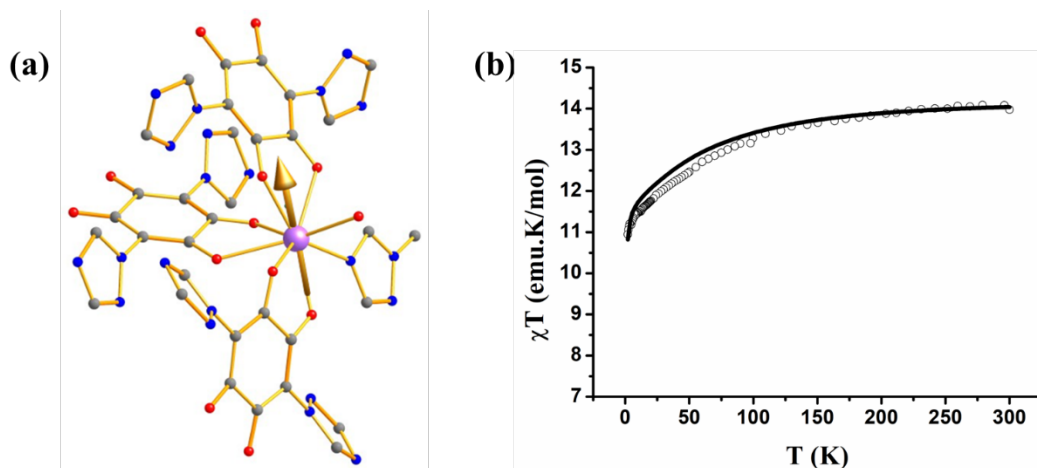

3.4 **Figure S6.** (a) The anisotropy axis of KD1 of **1a\_des**. Colour code: Dy:purple, O:red, N:blue, C:grey. Hydrogens are omitted for clarity. (b) A comparison of experimental and computed temperature dependent magnetization of **1a\_des**. The experimental data has been scaled with a factor of 0.90. We have added TIP (temperature independent paramagnetism) value of 0.005 emu/mol to correct the experimental  $\chi T$  value of **1a\_des**. A dipolar coupling (zJ) of  $-0.02 \text{ cm}^{-1}$  was considered in our calculations to simulate the experimental magnetic data.

3.5 **Table S13.** The CASSCF/RASSI-SO/SINGLE\_ANISO computed energy and g tensors of the  ${}^6\text{H}_{15/2}$  KDs for **1b**.

| Energy ( $\text{cm}^{-1}$ ) | $g_{xx}$ | $g_{yy}$ | $g_{zz}$ |
|-----------------------------|----------|----------|----------|
| 0.0                         | 0.021    | 0.041    | 19.547   |
| 102.6                       | 0.412    | 0.521    | 18.352   |
| 145.6                       | 3.231    | 4.950    | 12.319   |
| 184.0                       | 1.326    | 5.552    | 10.358   |
| 243.3                       | 0.113    | 1.917    | 15.031   |
| 304.9                       | 10.597   | 6.814    | 1.728    |
| 348.7                       | 2.364    | 4.755    | 10.862   |
| 401.0                       | 0.581    | 2.383    | 17.762   |

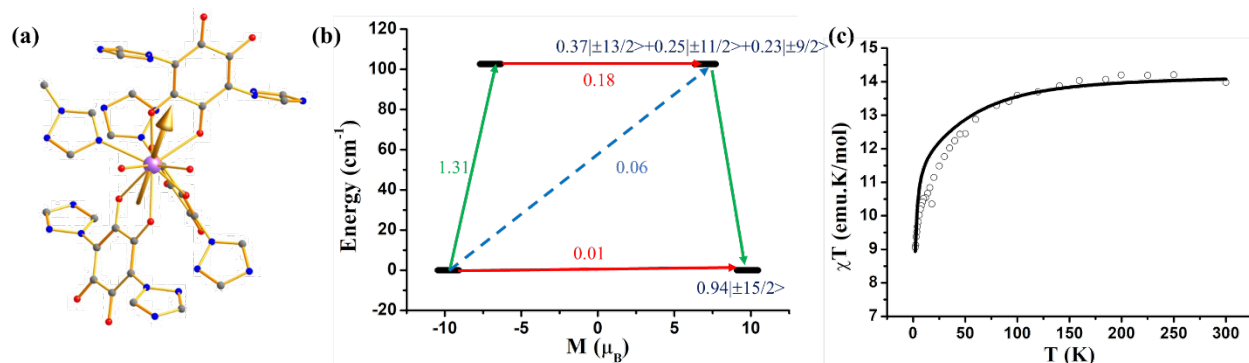

3.6 **Figure S7.** (a) The anisotropy axis of KD1 of **1b**. Colour code: Dy:purple, O:red, N:blue, C:grey. Hydrogens are omitted for clarity. (b) The energy vs magnetic moment for  $J = 15/2$  ground state of Dy in **1b**. The red arrow represents QTM via ground state and TA-QTM via first excited state. The sky blue dotted arrow represent the Orbach process. The green arrow shows possible mechanism of magnetization relaxation. (c) A comparison of experimental and computed temperature dependent magnetization of **1b**. A dipolar coupling ( $zJ$ ) of  $-0.08 \text{ cm}^{-1}$  was considered in our calculations to simulate the experimental magnetic data. The computed data has been scaled with a scaling factor of 1.1 for **1b**.

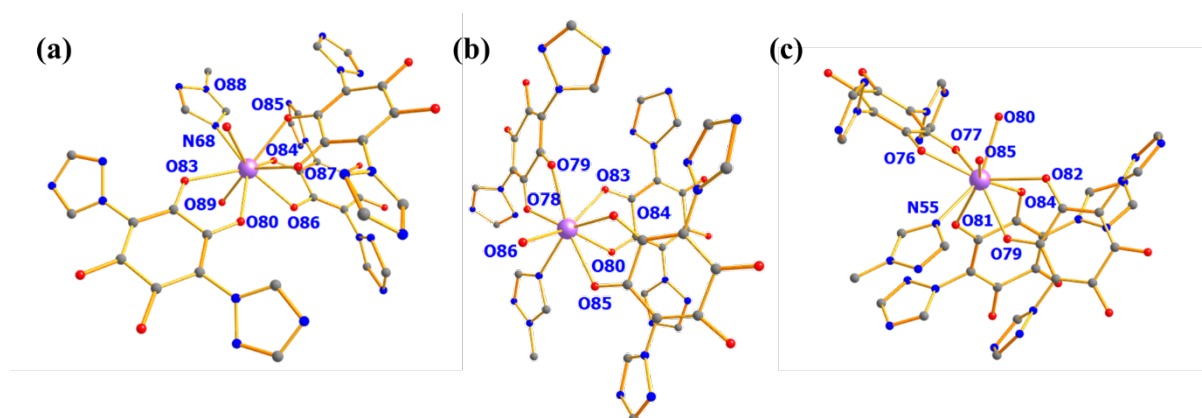

3.7 **Figure S8.** Loprop charge model of (a) **1a**, (b) **1a\_des** and (c) **1b** for Table S14. Colour code: Dy:purple, O:red, N:blue, C:grey. Hydrogens are omitted for clarity.

3.8 **Table S14.** The CASSCF computed Loprop charges metal and atoms in the first coordination sphere of **1a**, **1a\_des** and **1b**.

| Atom | <b>1a</b> | Atom | <b>1a_des</b> | Atom | <b>1b</b> |
|------|-----------|------|---------------|------|-----------|
| Dy   | 2.5196    | Dy   | 2.5178        | Dy   | 2.5176    |
| O80  | -0.6985   | O78  | -0.7488       | O76  | -0.7443   |
| O83  | -0.7128   | O79  | -0.7182       | O77  | -0.6576   |
| O84  | -0.6728   | O80  | -0.7339       | O79  | -0.7263   |

|     |         |     |         |     |         |
|-----|---------|-----|---------|-----|---------|
| O85 | -0.7278 | O83 | -0.6796 | O80 | -0.7085 |
| O86 | -0.6991 | O84 | -0.7536 | O81 | -0.6925 |
| O87 | -0.7211 | O85 | -0.6925 | O82 | -0.7204 |
| O88 | -0.6959 | O86 | -0.6898 | O84 | -0.7179 |
| O89 | -0.6761 | N67 | -0.4347 | O85 | -0.6910 |
| N68 | -0.4321 |     |         | N55 | -0.3976 |

3.9 Table S15. The computed crystal field parameters ( $B_k^q$ ; Stevens notation) in  $\text{cm}^{-1}$  obtained for **1a**, **1a\_des** and **1b**.

| K | Q        | 1a        | 1a_des    | 1b        |
|---|----------|-----------|-----------|-----------|
| 2 | -2       | -7.62E-01 | 2.21E+00  | -1.35E+00 |
|   | -1       | 6.54E-01  | 3.80E+00  | -3.77E+00 |
|   | 0        | -8.53E-01 | -3.13E+00 | -3.41E+00 |
|   | 1        | 2.02E-01  | 6.76E+00  | -5.47E-01 |
|   | 2        | 1.49E+00  | -7.04E-02 | 8.76E-01  |
| 4 | -4       | -4.60E-03 | 2.88E-02  | -1.09E-02 |
|   | -3       | -2.44E-02 | 1.54E-01  | -4.73E-02 |
|   | -2       | -2.81E-03 | 2.91E-02  | 4.32E-03  |
|   | -1       | 1.75E-03  | -4.53E-02 | 4.96E-02  |
|   | 0        | -1.92E-03 | -9.63E-03 | -3.76E-03 |
|   | 1        | 5.47E-03  | -7.32E-02 | 7.73E-03  |
|   | 2        | -2.43E-04 | -2.31E-02 | 1.98E-03  |
|   | 3        | -4.48E-02 | -2.43E-02 | -1.99E-02 |
| 6 | 4        | 3.48E-03  | -2.21E-02 | -1.30E-02 |
|   | -6       | -2.33E-05 | -1.37E-04 | -6.53E-05 |
|   | -5       | -8.58E-05 | -4.08E-04 | -1.11E-03 |
|   | -4       | -2.74E-04 | 7.21E-05  | -1.07E-04 |
|   | -3       | -3.12E-04 | -2.84E-06 | 2.52E-04  |
|   | -2       | -2.55E-05 | -3.40E-04 | 1.17E-04  |
|   | -1       | -8.55E-05 | 1.15E-04  | -2.64E-04 |
|   | 0        | -2.19E-05 | 3.18E-05  | 2.24E-06  |
|   | 1        | -5.12E-06 | 1.55E-05  | -3.24E-05 |
|   | 2        | -3.81E-05 | 9.72E-05  | -1.41E-04 |
|   | 3        | -1.75E-04 | -1.99E-05 | -5.51E-05 |
|   | 4        | 1.20E-05  | -3.28E-05 | -5.96E-05 |
|   | 5        | 2.50E-04  | 1.90E-04  | 1.74E-04  |
| 6 | 8.75E-05 | -1.24E-04 | 3.05E-04  |           |



3.10 **Table S16.** The CASSCF/RASSI-SO/SINGLE\_ANISO computed energy ( $\text{cm}^{-1}$ ) of low lying states generated from  ${}^7F_6$  for **2a**, **2a-des** and **2b**.

| <b>2a</b> | <b>2a-des</b> | <b>2b</b> |
|-----------|---------------|-----------|
| 0.0       | 0.0           | 0.0       |
| 0.7       | 0.1           | 0.1       |
| 75.1      | 137.9         | 138.4     |
| 83.1      | 139.6         | 138.9     |
| 116.2     | 214.2         | 198.5     |
| 136.8     | 224.4         | 203.4     |
| 148.7     | 268.1         | 274.8     |
| 184.4     | 290.1         | 282.6     |
| 186.5     | 323.1         | 343.8     |
| 259.9     | 325.6         | 364.0     |
| 260.3     | 347.0         | 393.1     |
| 357.0     | 599.6         | 441.0     |
| 357.1     | 600.2         | 446.7     |

3.11 **Table S17.** The CASSCF/RASSI-SO/SINGLE\_ANISO computed  $g_{zz}$  and  $m_j$  composition of first two pKDs (pseudo KDs) from  ${}^7F_6$  for **2a**, **2a-des** and **2b**.

| <b>2a</b> |                                                             | <b>2a-des</b> |                                                             | <b>2b</b> |                     |
|-----------|-------------------------------------------------------------|---------------|-------------------------------------------------------------|-----------|---------------------|
| $g_{zz}$  | $m_j$ composition                                           | $g_{zz}$      | $m_j$ composition                                           | $g_{zz}$  | $m_j$ composition   |
| 17.389    | $0.93 \pm 6\rangle$                                         | 17.716        | $0.97 \pm 6\rangle$                                         | 17.889    | $0.99 \pm 6\rangle$ |
| 14.551    | $0.36 \pm 5\rangle + 0.31 \pm 3\rangle + 0.22 \pm 1\rangle$ | 15.216        | $0.59 \pm 5\rangle + 0.16 \pm 3\rangle + 0.15 \pm 4\rangle$ | 15.139    | $0.86 \pm 5\rangle$ |

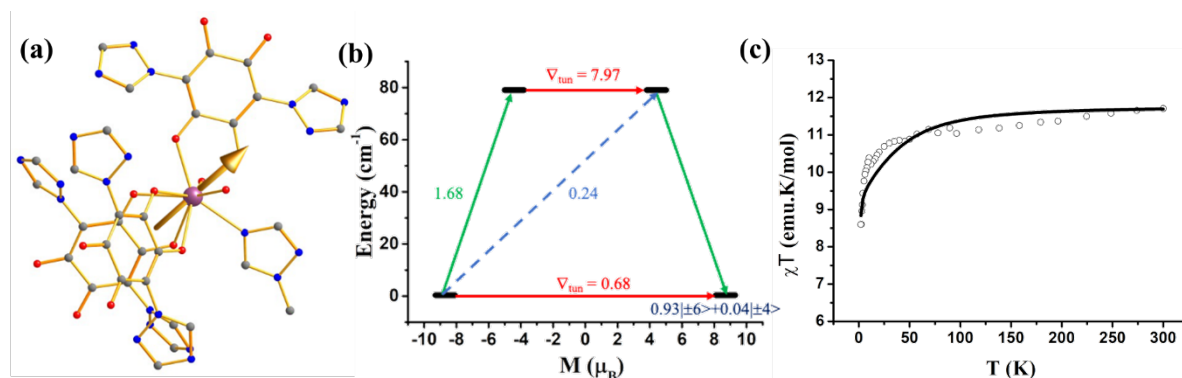

**Figure S9.** (a) The anisotropy axis of KD1 of **2a**. Colour code: Tb:maroon, O:red, N:blue, C:grey. Hydrogens are omitted for clarity. (b) The mechanism of magnetization relaxation of **2a**. The red arrow represents tunnel splitting via ground state and first excited state. The sky blue dotted arrow represent the Orbach process. The green arrow shows possible mechanism of

magnetization relaxation. (c) A comparison of experimental and computed temperature dependent magnetization of **2a**. We have added TIP (temperature independent paramagnetism) value of 0.005 emu/mol to correct the experimental  $\chi T$  value of **2a**. A dipolar coupling ( $zJ$ ) of  $-0.01 \text{ cm}^{-1}$  was considered in our calculations to simulate the experimental magnetic data.

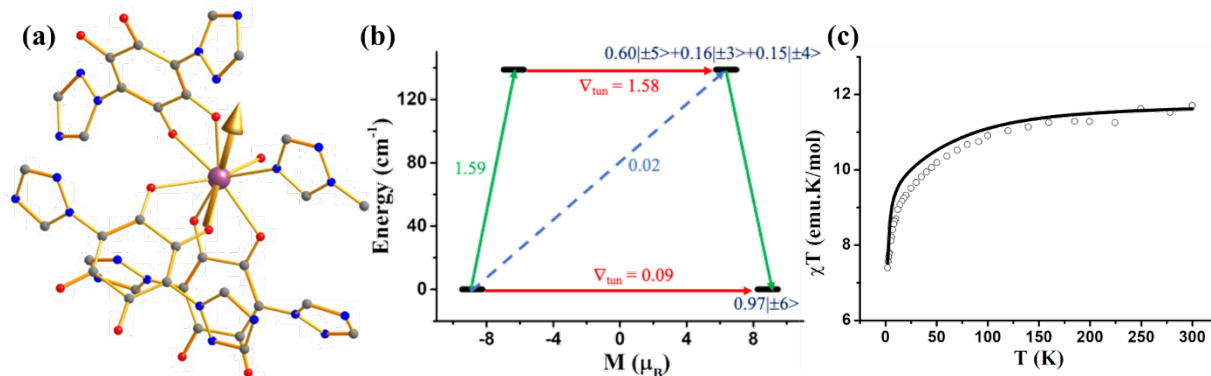

3.12 **Figure S10.** (a) The anisotropy axis of KD1 of **2a\_des**. Colour code: Tb:maroon, O:red, N:blue, C:grey. Hydrogens are omitted for clarity. (b) The mechanism of magnetization relaxation of **2a\_des**. The red arrow represents tunnel splitting via ground state and first excited state. The sky blue dotted arrow represent the Orbach process. The green arrow shows possible mechanism of magnetization relaxation. (c) A comparison of experimental and computed temperature dependent magnetization of **2a\_des**. We have added TIP (temperature independent paramagnetism) value of 0.005 emu/mol to correct the experimental  $\chi T$  value of **2a**. A dipolar coupling ( $zJ$ ) of  $-0.05 \text{ cm}^{-1}$  was considered in our calculations to simulate the experimental magnetic data.

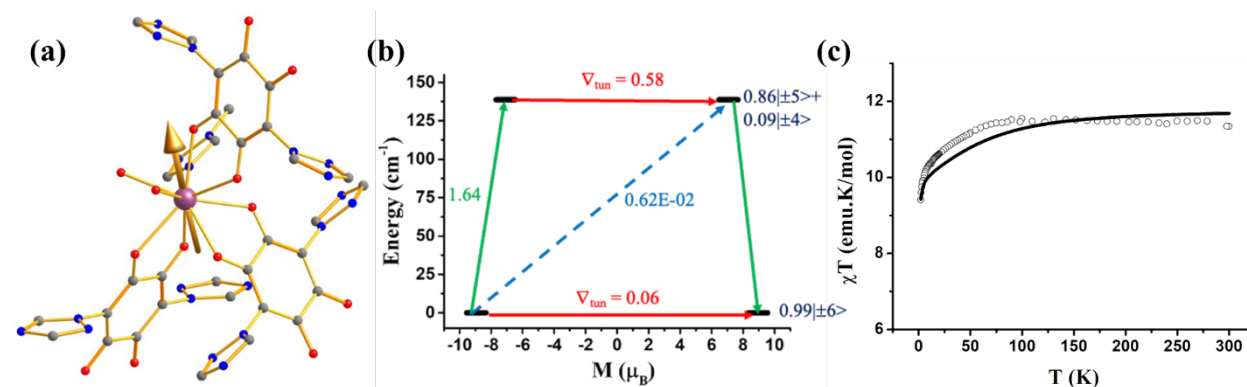

3.13 **Figure S11.** (a) The anisotropy axis of KD1 of **2b**. Colour code: Tb:maroon, O:red, N:blue, C:grey. Hydrogens are omitted for clarity. (b) The mechanism of magnetization relaxation of **2b**. The red arrow represents tunnel splitting via ground state and first excited state. The sky blue dotted arrow represent the Orbach process. The green arrow shows possible mechanism of magnetization relaxation. (c) A comparison of experimental and computed temperature dependent magnetization of **2b**. We have added a scaling factor of 0.9 to correct the experimental  $\chi T$  value of **2b**. A dipolar coupling ( $zJ$ ) of  $-0.01 \text{ cm}^{-1}$  was considered in our calculations to simulate the experimental magnetic data.

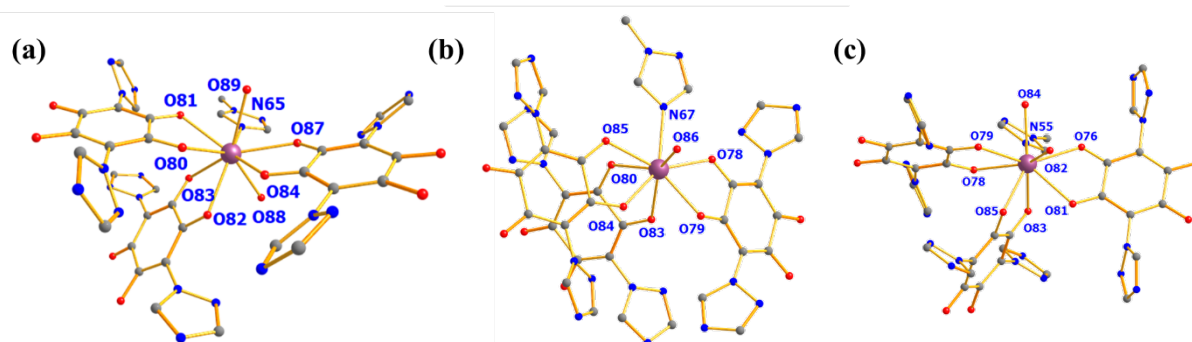

3.14 **Figure S12.** Loprop charge model of (a) **2a** (b) **2a\_des** (c) **2b** for Table S19. Colour code: Tb:maroon, O:red, N:blue, C:grey. Hydrogens are omitted for clarity.

3.15 **Table S18.** The CASSCF computed Loprop charges metal and atoms in the first coordination sphere of **2a**, **2a\_des** and **2b**.

| Atom | <b>2a</b> | Atom | <b>2a_des</b> | Atom | <b>2b</b> |
|------|-----------|------|---------------|------|-----------|
| Tb   | 2.5191    | Tb   | 2.5167        | Tb   | 2.5172    |
| O80  | -0.6908   | O78  | -0.7548       | O76  | -0.7557   |
| O81  | -0.7353   | O79  | -0.7058       | O78  | -0.7304   |
| O82  | -0.6657   | O80  | -0.7363       | O79  | -0.7093   |
| O83  | -0.7471   | O83  | -0.6778       | O81  | -0.6503   |
| O84  | -0.7064   | O84  | -0.7542       | O82  | -0.6934   |
| O87  | -0.6915   | O85  | -0.6974       | O83  | -0.7147   |
| O88  | -0.6910   | O86  | -0.6891       | O84  | -0.6968   |
| O89  | -0.6824   | N67  | -0.4360       | O85  | -0.6925   |
| N65  | -0.4287   |      |               | N55  | -0.3988   |

3.16 **Table S19.** The computed crystal field parameters ( $B_k^q$ ; Stevens notation) in  $\text{cm}^{-1}$  obtained for **2a**, **2a\_des** and **2b**.

| k | q  | <b>2a</b> | <b>2a_des</b> | <b>2b</b> |
|---|----|-----------|---------------|-----------|
| 2 | -2 | 3.01E+00  | -1.71E+00     | -1.50E+00 |

|   |    |           |           |           |
|---|----|-----------|-----------|-----------|
|   | -1 | -7.23E-01 | 1.45E-01  | 2.31E+00  |
|   | 0  | -1.88E+00 | -5.99E+00 | -2.85E+00 |
|   | 1  | 1.12E+00  | -2.22E-01 | -1.25E+00 |
|   | 2  | 1.90E+00  | -3.08E+00 | 1.44E+00  |
|   | -4 | 1.51E-03  | -2.12E-02 | -1.75E-02 |
|   | -3 | 4.81E-02  | 1.55E-02  | 3.97E-02  |
|   | -2 | 5.79E-03  | 4.22E-02  | 4.74E-03  |
|   | -1 | 1.66E-02  | 2.82E-03  | -3.55E-02 |
| 4 | 0  | -4.47E-03 | 3.78E-03  | -5.80E-03 |
|   | 1  | -5.76E-03 | 9.70E-03  | 1.41E-02  |
|   | 2  | 5.23E-03  | 2.14E-04  | -1.25E-02 |
|   | 3  | 5.27E-02  | -1.60E-01 | -1.61E-02 |
|   | 4  | -3.62E-02 | -7.39E-02 | 9.97E-03  |
|   | -6 | -1.24E-04 | 9.37E-05  | 3.85E-04  |
|   | -5 | -2.25E-04 | -3.67E-04 | -2.42E-04 |
|   | -4 | 5.43E-05  | -3.80E-05 | -5.99E-05 |
|   | -3 | 1.33E-04  | 1.24E-04  | -4.81E-05 |
|   | -2 | 2.23E-05  | -2.12E-04 | -2.94E-05 |
|   | -1 | 9.02E-06  | -4.06E-05 | 3.22E-04  |
| 6 | 0  | -3.35E-05 | -1.93E-05 | 1.00E-05  |
|   | 1  | 1.01E-05  | 1.53E-05  | -7.35E-05 |
|   | 2  | -8.68E-05 | 3.21E-06  | -8.29E-05 |
|   | 3  | 2.45E-05  | 3.55E-04  | 2.04E-04  |
|   | 4  | -1.73E-04 | 2.47E-04  | 2.18E-05  |
|   | 5  | 2.56E-04  | 5.85E-04  | -1.11E-03 |
|   | 6  | 5.23E-05  | -2.85E-04 | 3.72E-05  |

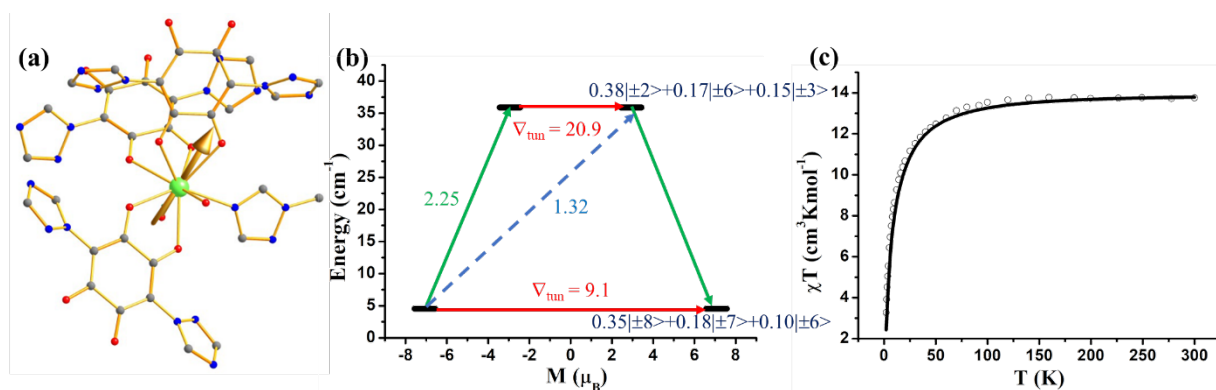

3.17 **Figure S13.** (a) The anisotropy axis of KD1 of **3a**. Colour code: Ho:green, O:red, N:blue, C:grey. Hydrogens are omitted for clarity. (b) The mechanism of magnetization relaxation of **3a**. The red arrow represents tunnel splitting via ground state and first excited state. The sky blue dotted arrow represent the Orbach process. The green arrow shows possible mechanism of magnetization relaxation. (c) A comparison of experimental and computed temperature dependent magnetization of **3a**. The experimental data has been scaled by a factor of 0.90. A dipolar coupling ( $zJ$ ) of  $-0.5 \text{ cm}^{-1}$  was considered in our calculations to simulate the experimental magnetic data.

3.18 **Table S20.** The CASSCF/RASSI-SO/SINGLE\_ANISO computed energy ( $\text{cm}^{-1}$ ) of low lying states generated from  $^5I_8$  for **3a**, **3a-des** and **3b**.

| <b>3a</b> | <b>3a-des</b> | <b>3b</b> |
|-----------|---------------|-----------|
| 0.0       | 0.0           | 0.0       |
| 9.1       | 0.7           | 3.7       |
| 25.4      | 73.9          | 32.4      |
| 46.3      | 84.7          | 57.3      |
| 56.5      | 94.7          | 87.8      |
| 64.7      | 111.8         | 105.6     |
| 65.8      | 141.2         | 116.9     |
| 82.7      | 160.3         | 123.3     |
| 96.5      | 166.0         | 134.5     |
| 149.1     | 177.6         | 169.5     |
| 163.7     | 194.5         | 190.4     |
| 177.5     | 210.0         | 199.0     |
| 193.9     | 223.0         | 208.9     |
| 223.9     | 248.6         | 248.8     |
| 230.9     | 258.0         | 275.5     |
| 255.9     | 281.0         | 283.8     |
| 258.7     | 286.3         | 297.0     |

3.19 **Table S21.** The CASSCF/RASSI-SO/SINGLE\_ANISO computed  $g_{zz}$  and  $m_J$  composition of first two pKDs (pseudo KDs) from  $^5I_8$  for **3a**, **3a-des** and **3b**.

| <b>3a</b> |                                 | <b>3a-des</b> |                                 | <b>3b</b> |                                 |
|-----------|---------------------------------|---------------|---------------------------------|-----------|---------------------------------|
| $g_{zz}$  | $m_J$ composition               | $g_{zz}$      | $m_J$ composition               | $g_{zz}$  | $m_J$ composition               |
| 14.140    | $0.35 ±8\rangle+0.18 ±7\rangle$ | 18.807        | $0.84 ±8\rangle+0.03 ±6\rangle$ | 16.967    | $0.62 ±8\rangle+0.16 ±5\rangle$ |
| 9.583     | $0.38 ±2\rangle+0.17 ±6\rangle$ | 14.393        | $0.34 ±3\rangle+0.19 ±7\rangle$ | 13.489    | $0.40 ±4\rangle+0.17 ±5\rangle$ |

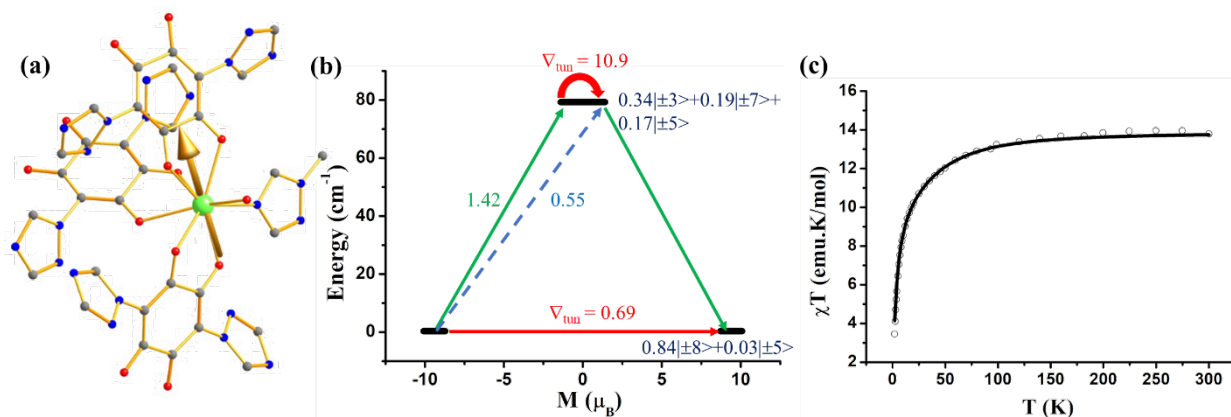

3.20 **Figure S14.** (a) The anisotropy axis of KD1 of **3a\_des**. Colour code: Ho:green, O:red, N:blue, C:grey. Hydrogens are omitted for clarity. (b) The mechanism of magnetization relaxation of **3a\_des**. The red arrow represents tunnel splitting via ground state and first excited state. The sky blue dotted arrow represent the Orbach process. The green arrow shows possible mechanism of magnetization relaxation. (c) A comparison of experimental and computed temperature dependent magnetization of **3a\_des**. The experimental data has been scaled by a factor of 0.80. A dipolar coupling ( $zJ$ ) of  $-0.7 \text{ cm}^{-1}$  was considered in our calculations to simulate the experimental magnetic data.

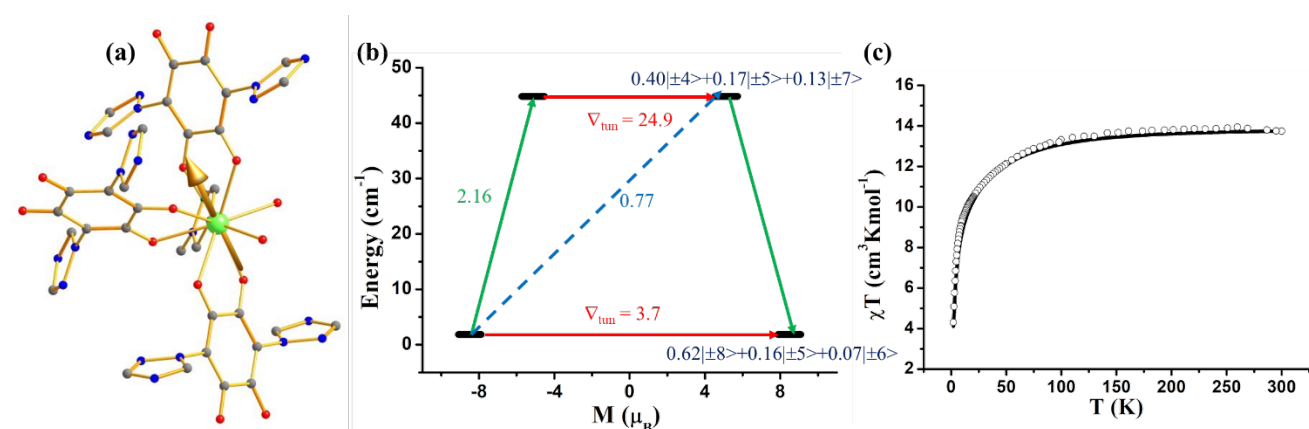

3.21 **Figure S15.** (a) The anisotropy axis of KD1 of **3b**. Colour code: Ho:green, O:red, N:blue, C:grey. Hydrogens are omitted for clarity. (b) The mechanism of magnetization relaxation of **3b**. The red arrow represents tunnel splitting via ground state and first excited state. The sky blue dotted arrow represent the Orbach process. The green arrow shows possible mechanism of magnetization relaxation. (c) A comparison of experimental and computed temperature dependent magnetization of **3b**. A dipolar coupling ( $zJ$ ) of  $-0.4 \text{ cm}^{-1}$  was considered in our calculations to simulate the experimental magnetic data.

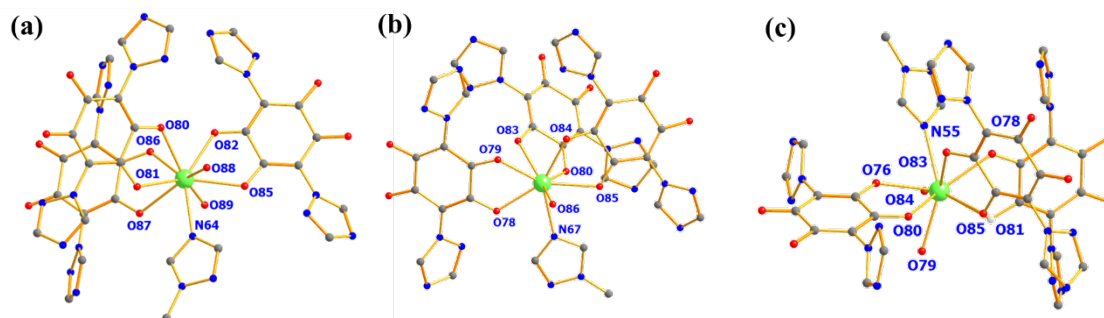

3.22 **Figure S16.** Loprop charge model of (a) **3a** (b) **3a\_des** (c) **3b** for Table S24. Colour code: Ho:green, O:red, N:blue, C:grey. Hydrogens are omitted for clarity.

3.23 **Table S22.** The CASSCF computed Loprop charges metal and atoms in the first coordination sphere of **3a**, **3a\_des** and **3b**.

| Atom | <b>3a</b> | Atom | <b>3a_des</b> | Atom | <b>3b</b> |
|------|-----------|------|---------------|------|-----------|
| Ho   | 2.5145    | Ho   | 2.5150        | Ho   | 2.5128    |
| O80  | -0.6650   | O78  | -0.7485       | O76  | -0.7463   |
| O81  | -0.7328   | O79  | -0.7178       | O78  | -0.7193   |
| O82  | -0.6882   | O80  | -0.7338       | O79  | -0.7143   |
| O85  | -0.7238   | O83  | -0.6791       | O80  | -0.6515   |
| O86  | -0.6802   | O84  | -0.7534       | O81  | -0.7224   |
| O87  | -0.7338   | O85  | -0.6923       | O83  | -0.6936   |
| O88  | -0.7023   | O86  | -0.6974       | O84  | -0.6961   |
| O89  | -0.6877   | N67  | -0.4346       | O85  | -0.7144   |
| N64  | -0.4424   |      |               | N55  | -0.3983   |

3.24 **Table S23.** The computed crystal field parameters ( $B_k^q$ ; Stevens notation) in  $\text{cm}^{-1}$  obtained for **3a**, **3a\_des** and **3b**.

| k | q  | <b>3a</b> | <b>3a_des</b> | <b>3b</b> |
|---|----|-----------|---------------|-----------|
| 2 | -2 | -1.05E-01 | 4.87E-02      | 1.74E-01  |
|   | -1 | 4.96E-01  | -9.31E-01     | -1.75E-01 |
|   | 0  | -3.13E-01 | -5.84E-01     | -5.45E-01 |
|   | 1  | -4.24E-04 | 2.76E-01      | 2.26E-01  |

|   |    |           |           |           |
|---|----|-----------|-----------|-----------|
|   | 2  | -3.92E-01 | -5.61E-01 | -2.99E-01 |
|   | -4 | 4.52E-05  | -6.20E-03 | 3.82E-03  |
|   | -3 | 4.42E-03  | -6.49E-03 | 4.23E-03  |
|   | -2 | -9.92E-04 | -5.08E-03 | -1.39E-03 |
|   | -1 | 3.13E-03  | 5.46E-03  | 8.95E-03  |
| 4 | 0  | -7.45E-04 | -2.23E-03 | 1.07E-04  |
|   | 1  | -9.54E-04 | 3.15E-03  | -7.38E-03 |
|   | 2  | -1.57E-03 | -9.56E-03 | -1.98E-03 |
|   | 3  | 1.74E-02  | 1.34E-02  | 5.03E-03  |
|   | 4  | 4.78E-03  | -5.14E-03 | -8.55E-04 |
|   | -6 | -1.19E-04 | -9.38E-05 | -1.39E-04 |
|   | -5 | -1.86E-04 | -1.38E-04 | -1.05E-03 |
|   | -4 | -6.14E-05 | 7.58E-05  | -1.29E-04 |
|   | -3 | 2.33E-04  | 2.57E-04  | 4.68E-05  |
|   | -2 | -1.78E-05 | 9.74E-05  | -1.46E-04 |
|   | -1 | -7.70E-05 | 1.78E-05  | 2.52E-06  |
| 6 | 0  | 9.89E-06  | -1.14E-05 | -2.07E-05 |
|   | 1  | 1.94E-04  | 9.21E-05  | -4.00E-05 |
|   | 2  | 1.40E-04  | 2.35E-05  | 4.36E-05  |
|   | 3  | -3.66E-05 | -2.72E-04 | 4.07E-04  |
|   | 4  | -2.70E-04 | -8.18E-05 | -5.87E-06 |
|   | 5  | -7.70E-04 | -3.98E-05 | -4.30E-04 |
|   | 6  | -2.92E-05 | -2.86E-05 | -1.45E-04 |



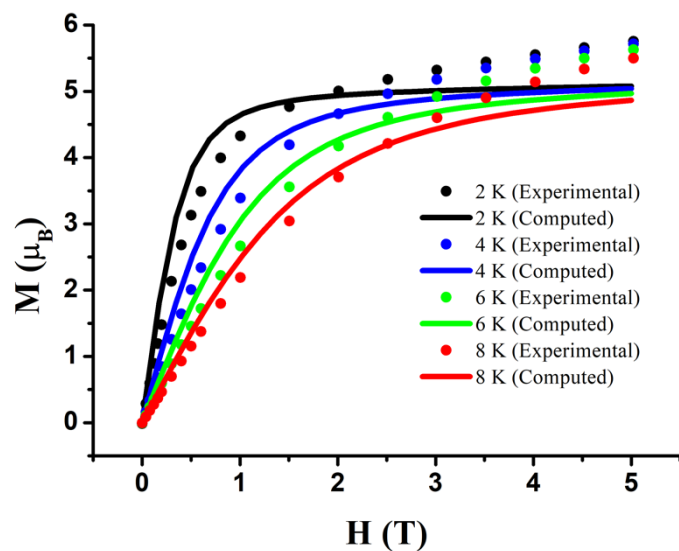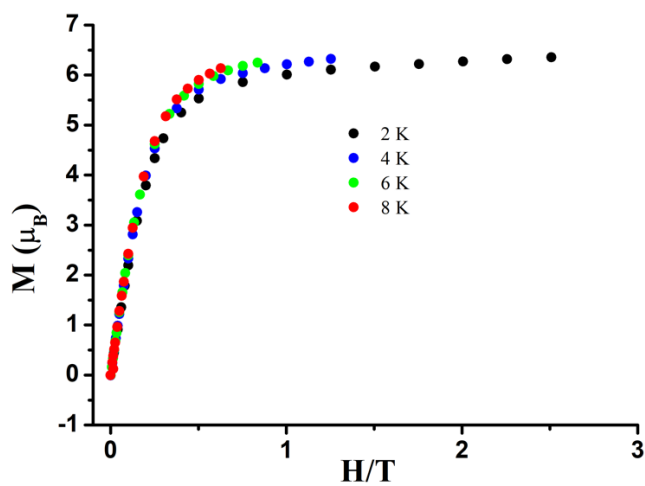

3.25 **Figure S17.** Magnetization ( $M$ ) versus field ( $H$ ) of **1a** from 2 to 8 K.

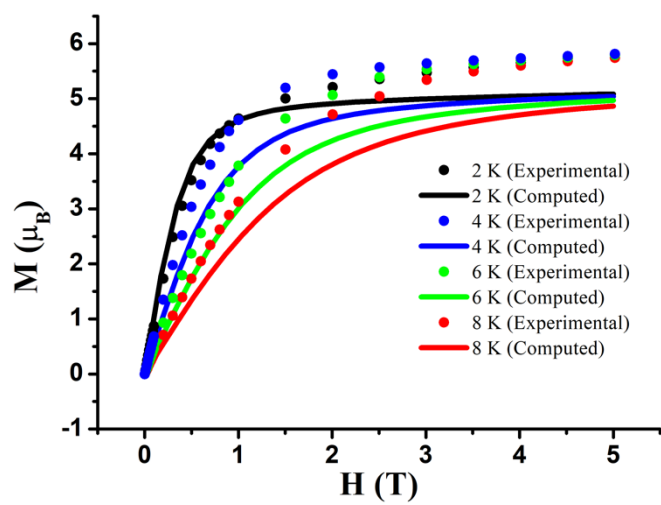

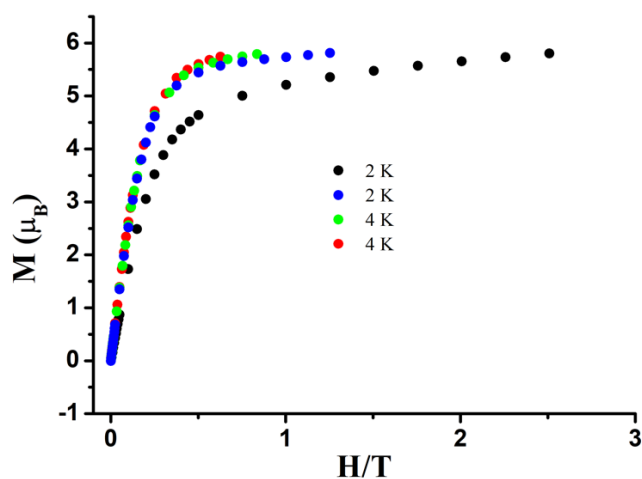

3.26 **Figure S18.** Magnetization ( $M$ ) versus field ( $H$ ) of **1a\_des** from 2 to 8 K.

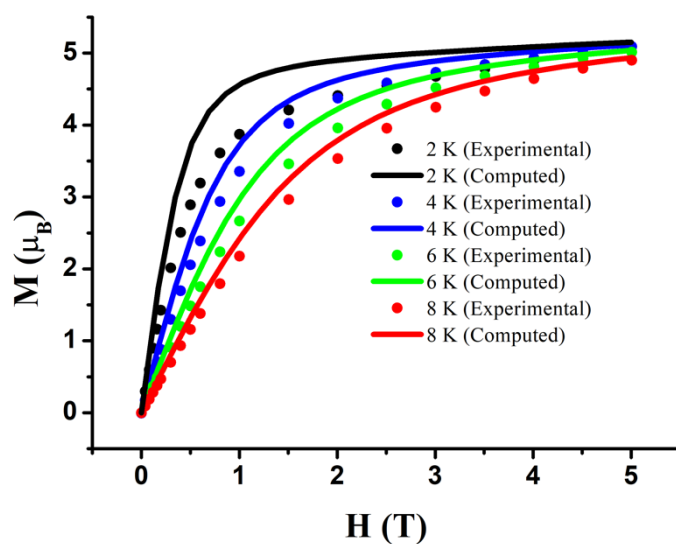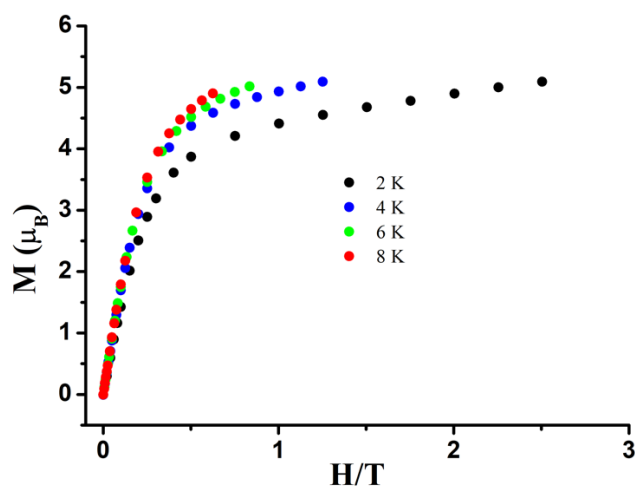

3.27 **Figure S19.** Magnetization ( $M$ ) versus field ( $H$ ) of **1b** from 2 to 8 K.

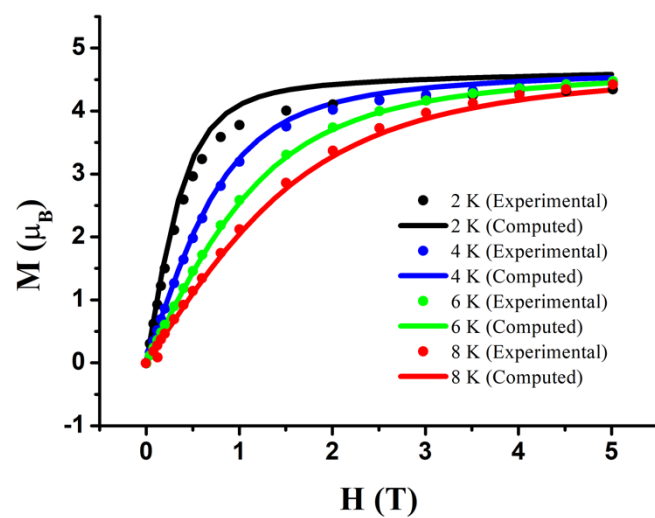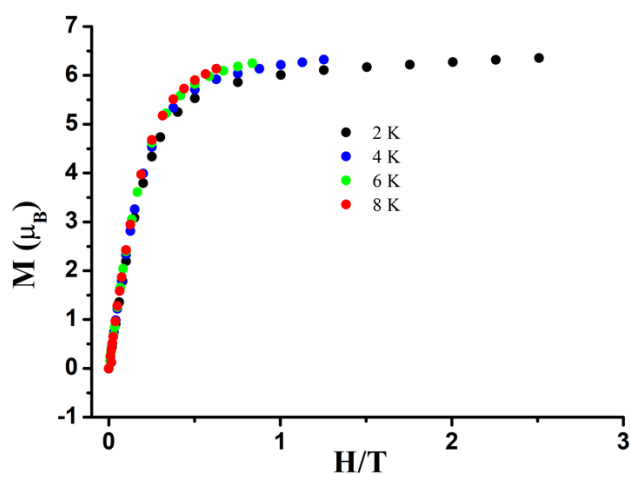

3.28 **Figure S20.** Magnetization ( $M$ ) versus field ( $H$ ) of **2a** from 2 to 8 K.

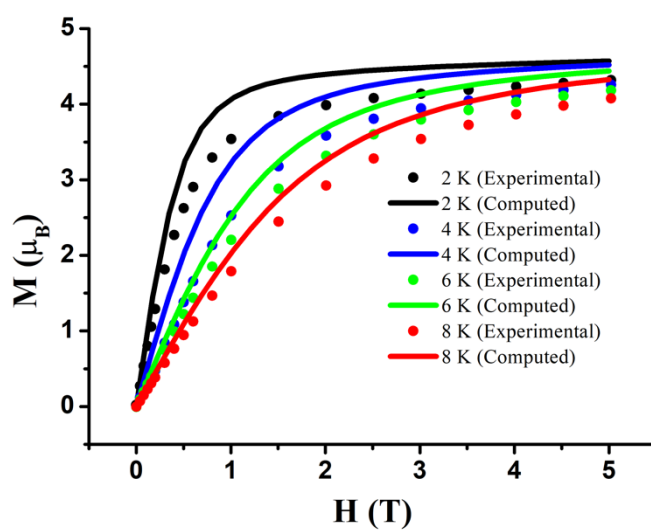

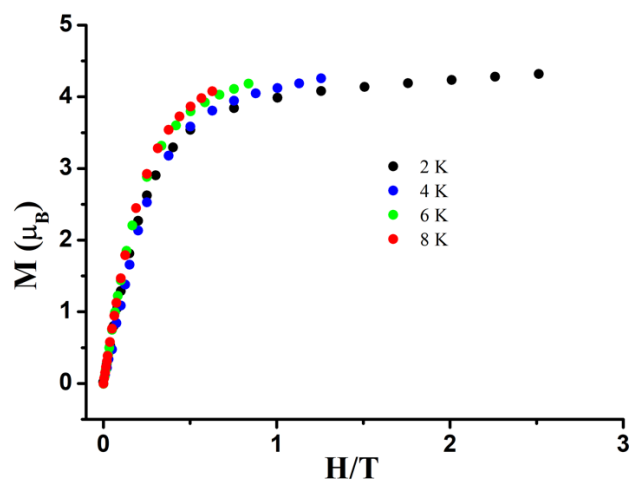

3.29 **Figure S21.** Magnetization ( $M$ ) versus field ( $H$ ) of **2a\_des** from 2 to 8 K.

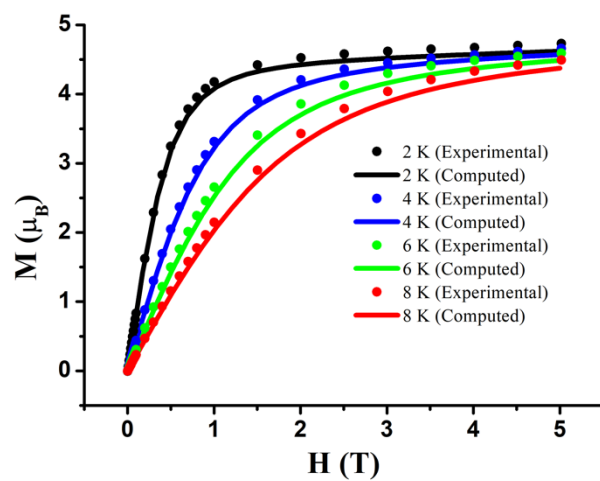

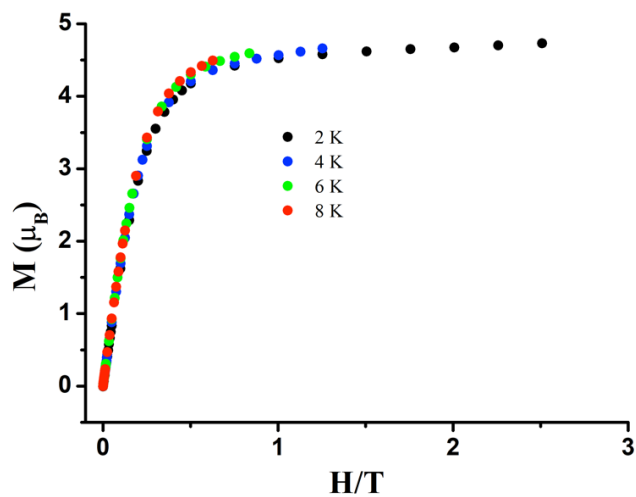

3.30 **Figure S22.** Magnetization ( $M$ ) versus field ( $H$ ) of **2b** from 2 to 8 K.

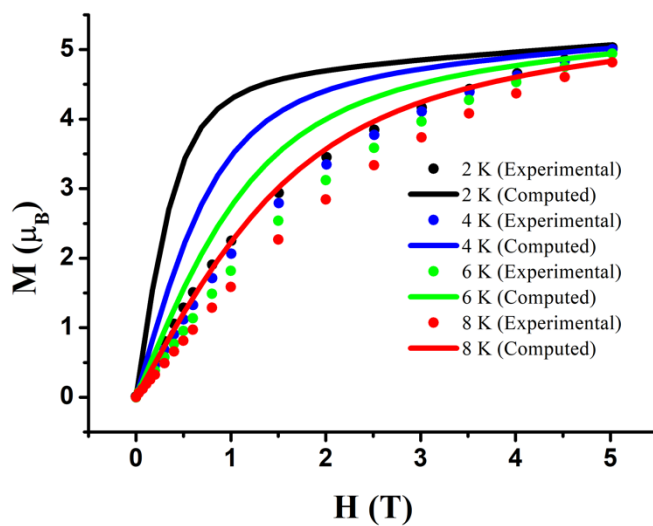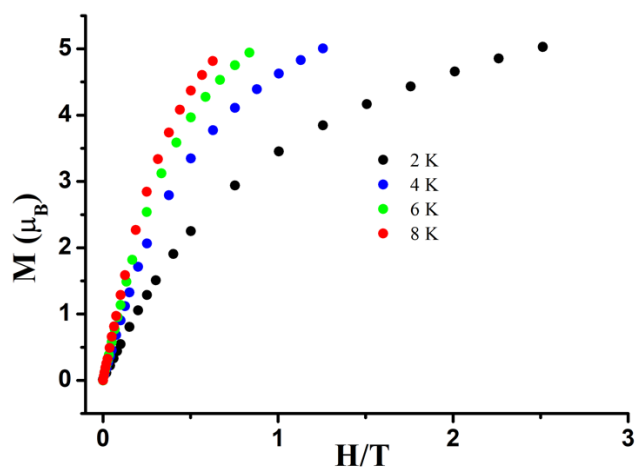

3.31 **Figure S23.** Magnetization ( $M$ ) versus field ( $H$ ) of **3a** from 2 to 8 K.

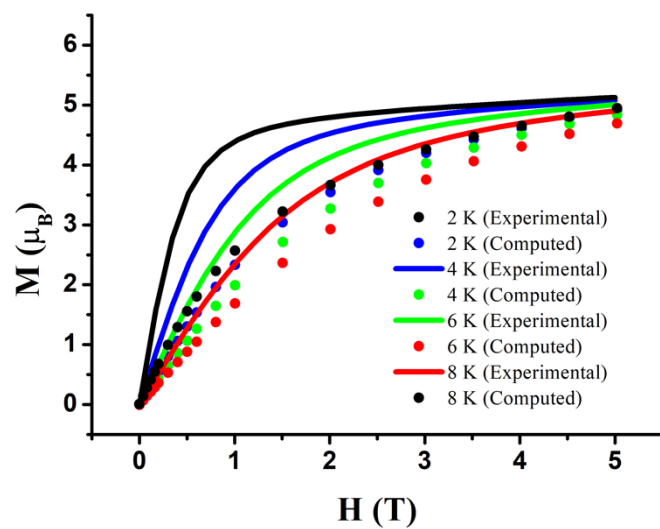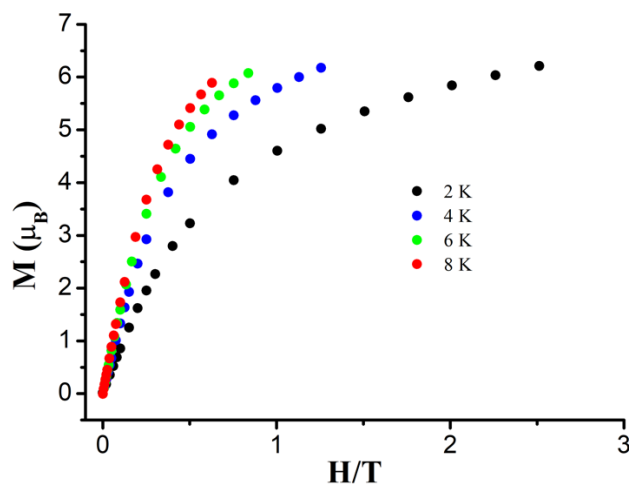

3.32 **Figure S24.** Magnetization ( $M$ ) versus field ( $H$ ) of **3a\_des** from 2 to 8 K.

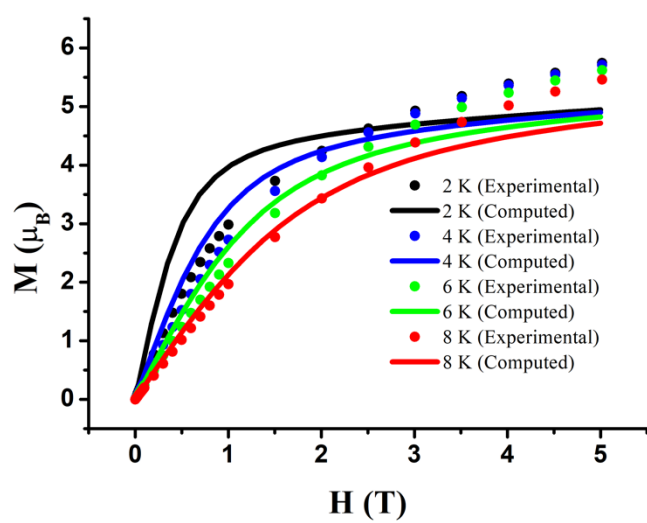

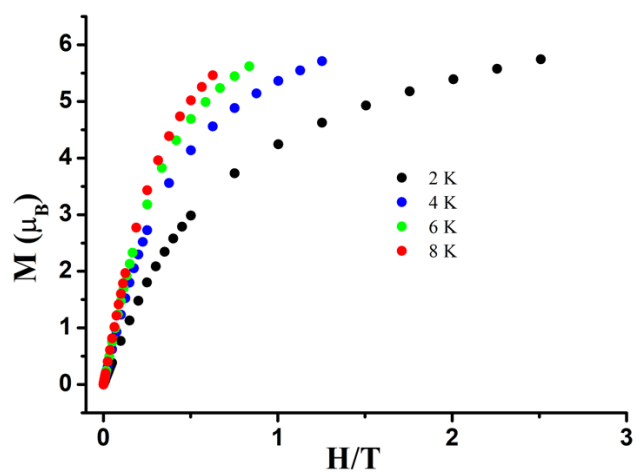

3.33 **Figure S25.** Magnetization ( $M$ ) versus field ( $H$ ) of **3b** from 2 to 8 K.

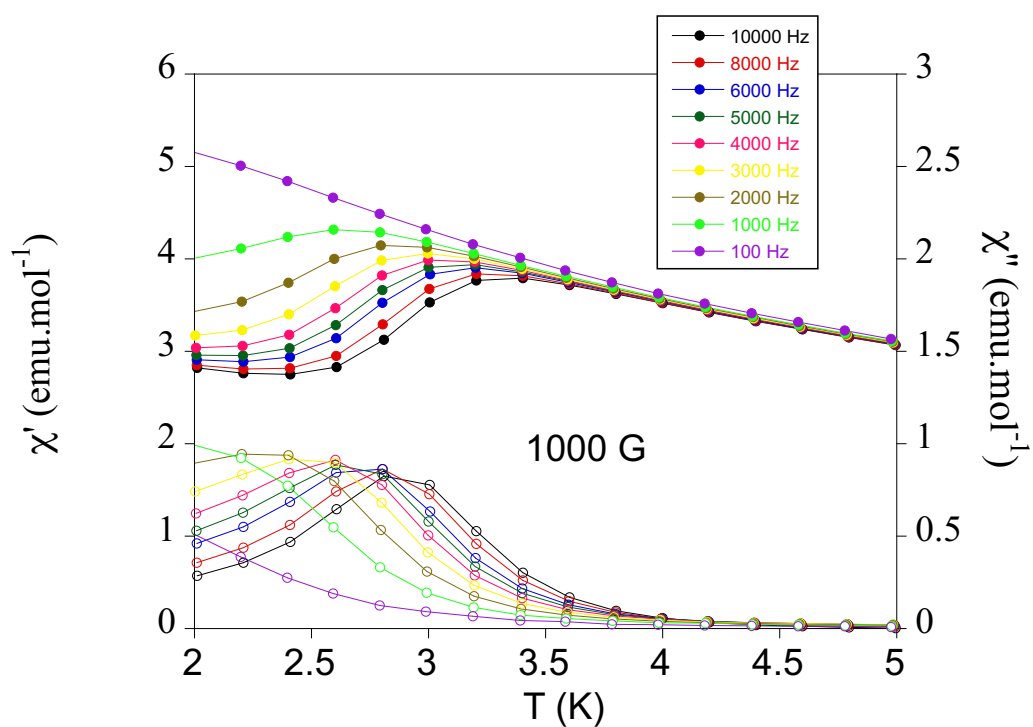

3.34 **Figure S26.** Temperature dependence of  $\chi'$  (full symbols) and  $\chi''$  (empty symbols) of **1a** measured in contact with the mother liquor in an applied dc field of 0.1 T at frequencies in the range 100 to 10000 Hz.



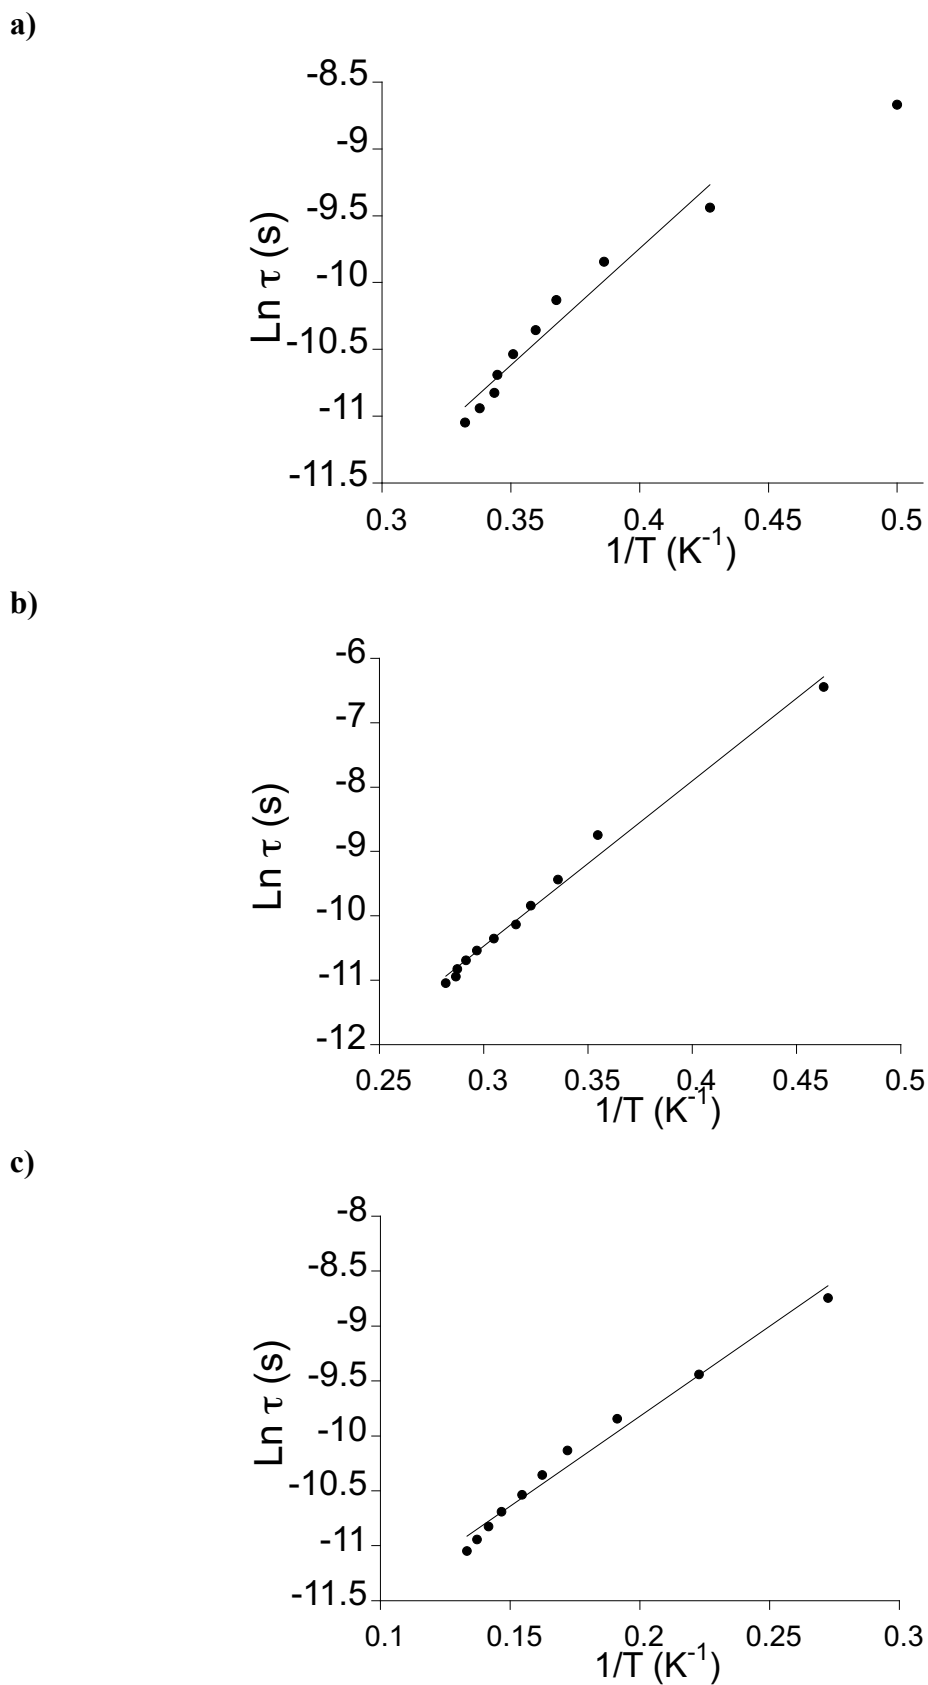

3.35 **Figure S27.** Plot of  $\text{Ln } \tau$  versus  $T^{-1}$  for **1a\_des** (a), **1b** (b) and **2b** (c).

a)

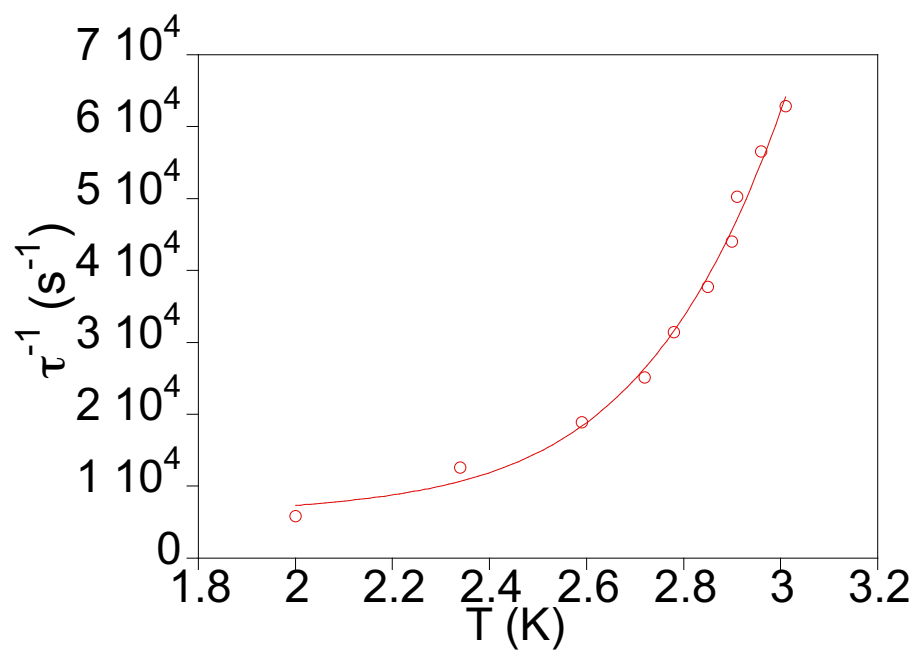

b)

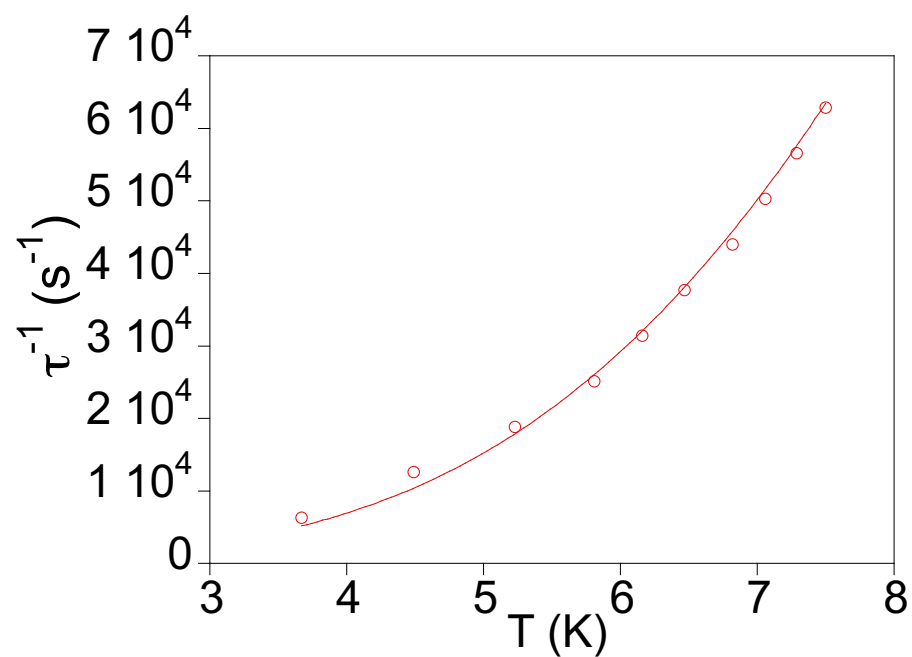

3.36 **Figure S28.** Thermal dependence of the relaxation time of **1a<sub>des</sub>** (a) and **2b** (b) and best fit from two terms mechanism described in text.

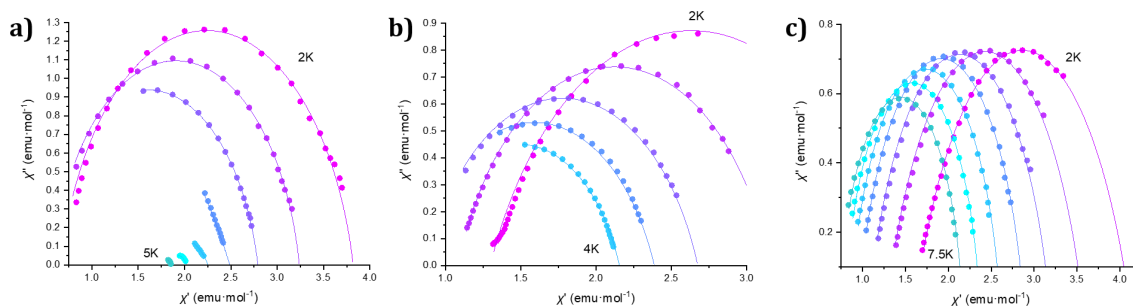

3.37 **Figure S29.** Cole-Cole plots of **1a\_des** (a) and **1b** (b) and **2b** (c) measured at the same temperatures as **Figures 10-12** under an applied dc field of 0.1 T. Solid lines represent the best fitting of the experimental data to a Cole-Cole function.

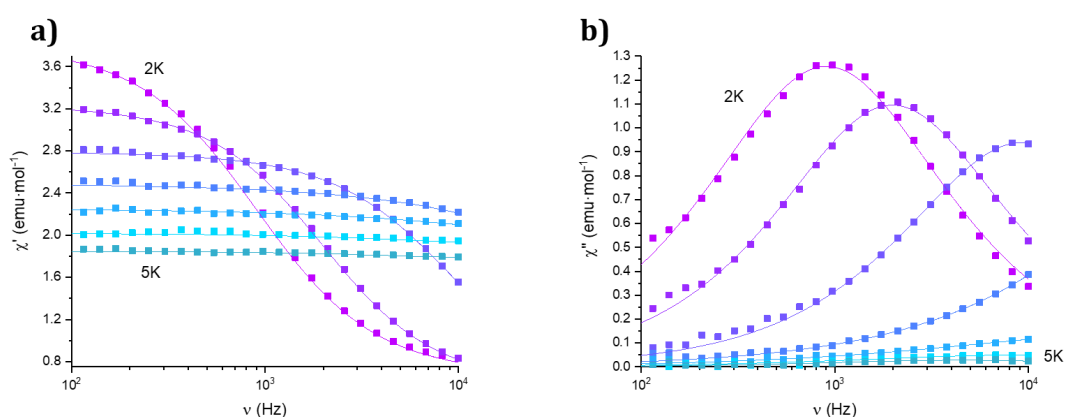

3.38 **Figure S30.** AC susceptibility in an applied dc field of 0.1 T of **1a\_des** measured as a function of the frequency at the different temperatures (2.0, 2.5, 3.0, 3.5, 4.0, 4.5 and 5.0 K). (a): Real component. (b): Imaginary component. Solid lines represent the best fitting of the experimental data to a Cole-Cole function.

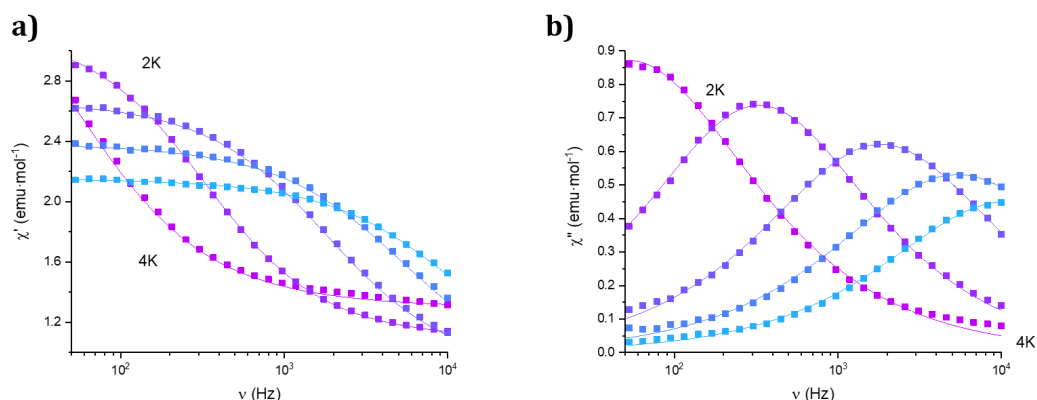

3.39 **Figure S31.** AC susceptibility in an applied dc field of 0.1 T of **1b** measured as a function of the frequency at the different temperatures (2.0, 2.5, 3.0, 3.5 and 4.0 K). (a): Real component. (b): Imaginary component. Solid lines represent the best fitting of the experimental data to a Cole-Cole function.

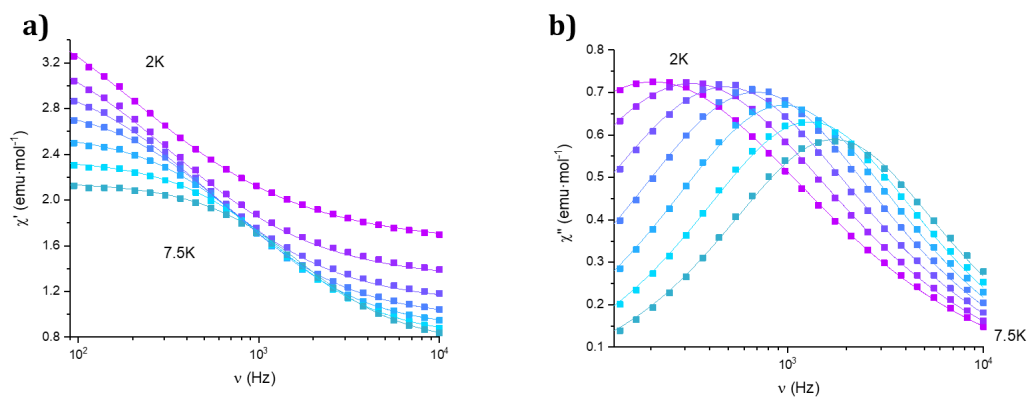

3.40 **Figure S32.** AC susceptibility in an applied dc field of 0.1 T **2b** measured as a function of the frequency at the different temperatures (2.0, 2.5, 3.0, 3.5, 4.0, 4.5, 5.0, 5.5, 6.0, 6.5, 7.0 and 7.5 K). (a): Real component. (b): Imaginary component. Solid lines represent the best fitting of the experimental data to a Cole-Cole function.
